# Supplementary material
Source: PubMed Central journal article supplement (PMC4801482)
Supplement: NIHMS765788-supplement-Supplement.pdf [file NIHMS765788-supplement-Supplement.pdf]

# **Brain Structure and Function – Special Issue on the Insula**

A link between the systems: functional differentiation and integration within the human insula revealed  
by Meta-Analysis

Florian Kurth<sup>1,2,\*</sup>, Karl Zilles<sup>1,2,4</sup>, Peter T. Fox<sup>3</sup>, Angela R. Laird<sup>3</sup>, Simon B. Eickhoff<sup>2,4,5</sup>

<sup>1</sup> C. & O. Vogt Institute of Brain Research, University Düsseldorf, Germany

<sup>2</sup> Institute for Neuroscience and Medicine (INM-2), Research Center Jülich, Germany

<sup>3</sup> Research Imaging Center, University of Texas Health Science Center at San Antonio, Texas, USA

<sup>4</sup> JARA - Translational Brain Medicine, Jülich, Germany

<sup>5</sup> Department of Psychiatry and Psychotherapy, RWTH Aachen University, Germany

## **Supplement #1:**

\*Correspondence should be addressed to:

Florian Kurth  
Institute for Neurosciences and Medicine (INM-2)  
Forschungszentrum Jülich GmbH  
Leo-Brandt Str. 5  
52425 Jülich, Germany  
Phone : +49 2461 61-8609  
Fax: +49 2461 61-2820  
E-mail: f.kurth@fz-juelich.de

**Tables of included studies, sorted by category (see Table 1)**

**Emotion:**

| BMapID | 1st Auth.  | Year | Journal                        | Experiments | Foci          |
|--------|------------|------|--------------------------------|-------------|---------------|
| 30028  | Hamann     | 1999 | Nature Neuroscience            | 2           | 4/6           |
| 30044  | Maddock    | 2003 | Human Brain Mapping            | 2           | 28/16         |
| 30120  | Canli      | 1998 | Neuroreport                    | 4           | 10/5/11/3     |
| 30219  | Elliott    | 2000 | Journal of Neuroscience        | 3           | 5/2/6         |
| 30272  | Bystritsky | 2001 | Neuroreport                    | 1           | 4             |
| 30288  | Paradiso   | 1999 | American Journal of Psychiatry | 4           | 8/5/3/6       |
| 30313  | Gandour    | 2003 | Human Brain Mapping            | 3           | 7/7/1         |
| 30366  | Baker      | 1997 | Psychological Medicine         | 2           | 8/12          |
| 30368  | Beauregard | 1998 | Neuroreport                    | 1           | 13            |
| 30377  | Damasio    | 2000 | Nature Neuroscience            | 4           | 16/14/13/3    |
| 30379  | Dolan      | 2000 | NeuroImage                     | 1           | 2             |
| 30380  | Dougherty  | 1999 | Biological Psychiatry          | 1           | 9             |
| 30383  | Gemar      | 1996 | Depression                     | 1           | 1             |
| 30384  | George     | 1995 | American Journal of Psychiatry | 2           | 6/5           |
| 30385  | George     | 1996 | Biological Psychiatry          | 6           | 19/4/11/5/4/2 |
| 30389  | Kosslyn    | 1996 | Neuroreport                    | 2           | 7/5           |
| 30390  | Lane       | 1997 | American Journal of Psychiatry | 6           | 8/14/6/7/16/4 |
| 30391  | Lane       | 1997 | Neuropsychologia               | 2           | 5/11          |

|         |                    |      |                                   |   |               |
|---------|--------------------|------|-----------------------------------|---|---------------|
| 30392   | Lane               | 1999 | Neuropsychologia                  | 2 | 4/1           |
| 30393   | Lane               | 1997 | Neuroreport                       | 1 | 4             |
| 30394   | Liberzon           | 2000 | Neuropsychopharmacology           | 1 | 3             |
| 30395   | Liotti             | 2000 | Biological Psychiatry             | 2 | 7/13          |
| 30397   | Mayberg            | 1999 | American Journal of Psychiatry    | 1 | 7             |
| 30409   | Pietrini           | 2000 | American Journal of Psychiatry    | 3 | 4/1/4         |
| 30413   | Reiman             | 1997 | American Journal of Psychiatry    | 2 | 13/7          |
| 30419   | Teasdale           | 1999 | American Journal of Psychiatry    | 3 | 7/6/7         |
| 30453   | Royet              | 2000 | Journal of Neuroscience           | 3 | 2/4/3         |
| 30456   | Simpson            | 2000 | Journal of Cognitive Neuroscience | 2 | 47/41         |
| 30459   | Taylor             | 1998 | NeuroImage                        | 2 | 2/3           |
| 30460   | Taylor             | 2000 | Neuropsychologia                  | 3 | 3/4/2         |
| 4040032 | Lee                | 2004 | Cognitive Behavioral Neurology    | 2 | 9/6           |
| 4040037 | Mitterschiffthaler | 2003 | Neuroreport                       | 1 | 9             |
| 6040030 | Goldin             | 2005 | NeuroImage                        | 4 | 17/6/13/16    |
| 6040031 | Markowitsch        | 2003 | Cortex                            | 4 | 4/4/4/6       |
| 6040032 | Pelletier          | 2003 | Neuroreport                       | 4 | 8/8/4/3       |
| 6040035 | Britton            | 2006 | NeuroImage                        | 6 | 4/6/3/10/10/6 |
| 6060082 | Drobyshevsky       | 2006 | NeuroImage                        | 1 | 18            |
| 6080120 | Keedwell           | 2005 | Biological Psychiatry             | 2 | 1/2           |
| 7010001 | Anand              | 2005 | Biological Psychiatry             | 1 | 10            |
| 7020072 | Cato               | 2004 | Journal of Cognitive Neuroscience | 2 | 6/5           |
| 7030079 | Frey               | 2000 | European Journal of Neuroscience  | 1 | 4             |

|         |           |      |                                                 |   |              |
|---------|-----------|------|-------------------------------------------------|---|--------------|
| 7030089 | Bartolo   | 2006 | Journal of Cognitive Neuroscience               | 2 | 16/18        |
| 7040092 | Buchanan  | 2000 | Cognitive Brain Research                        | 4 | 1/2/1/3      |
| 7040097 | Ethofer   | 2006 | Neuroreport                                     | 1 | 2            |
| 7040099 | Grandjean | 2005 | Nature Neuroscience                             | 2 | 8/7          |
| 7040102 | Kotz      | 2003 | Brain and Language                              | 4 | 10/3/10/12   |
| 7040106 | Mitchell  | 2003 | Neuropsychologia                                | 1 | 6            |
| 7060153 | Ogino     | 2007 | Cerebral Cortex                                 | 1 | 7            |
| 7070196 | Zald      | 2002 | Proceedings of the National Academy of Sciences | 2 | 4/4          |
| 7080206 | Shapira   | 2003 | Biological Psychiatry                           | 2 | 25/26        |
| 7090246 | Knutson   | 2001 | Journal of Neuroscience                         | 5 | 7/10/12/2/7  |
| 7090248 | Phan      | 2005 | Biological Psychiatry                           | 3 | 12/6/4       |
| 7090257 | Taylor    | 2003 | NeuroImage                                      | 3 | 7/9/4        |
| 7100299 | Stark     | 2007 | NeuroImage                                      | 4 | 9/7/8/5      |
| 7110305 | Herwig    | 2007 | Psychiatry Research                             | 3 | 9/8/2        |
| 7110352 | Nitschke  | 2004 | NeuroImage                                      | 1 | 6            |
| 7110356 | Schienze  | 2005 | Neuroscience Letters                            | 3 | 3/2/2        |
| 7120372 | Straube   | 2007 | NeuroImage                                      | 1 | 1            |
| 8030080 | Noriuchi  | 2008 | Biological Psychiatry                           | 5 | 14/15/9/37/6 |
| 8030083 | Coan      | 2006 | Psychological Science                           | 3 | 24/3/2       |
| 8040104 | Iaria     | 2008 | Human Brain Mapping                             | 1 | 15           |
| 8080167 | Bartels   | 2004 | NeuroImage                                      | 1 | 28           |
| 8080168 | Bartels   | 2000 | Neuroreport                                     | 1 | 13           |
| 8080177 | Eippert   | 2007 | Human Brain Mapping                             | 1 | 26           |

|         |             |      |                                            |   |            |
|---------|-------------|------|--------------------------------------------|---|------------|
| 8080180 | Fitzgerald  | 2004 | Neuroscience Letters                       | 1 | 15         |
| 8080182 | Goldin      | 2008 | Biological Psychiatry                      | 2 | 26/18      |
| 8080192 | Reiss       | 2008 | PLoS ONE                                   | 1 | 4          |
| 8080218 | Dolcos      | 2004 | NeuroImage                                 | 1 | 2          |
| 8100244 | Garrett     | 2006 | NeuroImage                                 | 3 | 29/10/15   |
| 8100248 | Mathews     | 2004 | Journal of Cognitive Neuroscience          | 4 | 22/7/14/5  |
| 8100253 | Wrase       | 2003 | Neuroscience Letters                       | 4 | 6/3/3/8    |
| 8110256 | Berpohl     | 2006 | Human Brain Mapping                        | 3 | 17/4/7     |
| 8110276 | Junghofer   | 2006 | Neuroreport                                | 1 | 14         |
| 8110289 | Najib       | 2004 | American Journal of Psychiatry             | 1 | 40         |
| 8110295 | Ranote      | 2004 | Neuroreport                                | 2 | 12/3       |
| 8110304 | Stark       | 2005 | Biological Psychology                      | 1 | 2          |
| 9010002 | Butler      | 2007 | Neuroscience                               | 1 | 17         |
| 9010012 | Malhi       | 2004 | European Journal of Neuroscience           | 2 | 38/14      |
| 9010016 | Sanjuan     | 2007 | Psychiatry Research                        | 1 | 5          |
| 9010022 | Wicker      | 2003 | Neuron                                     | 4 | 12/14/17/6 |
| 9010026 | Sabatinelli | 2007 | Journal of Neurophysiology                 | 4 | 19/14/15/9 |
| 9020040 | Herpertz    | 2008 | Journal of Child Psychology and Psychiatry | 2 | 21/8       |

---

**Empathy:**

| BMapID | 1st Auth.     | Year | Journal                                                                   | Experiments | Foci                 |
|--------|---------------|------|---------------------------------------------------------------------------|-------------|----------------------|
| 30138  | Hariri        | 2000 | Neuroreport                                                               | 2           | 4/2                  |
| 30302  | Abel          | 2003 | Neuroreport                                                               | 1           | 8                    |
| 30314  | Gorno-Tempini | 2001 | NeuroImage                                                                | 5           | 10/11/11/11/11       |
| 30324  | Kesler-West   | 2001 | Cognitive Brain Research                                                  | 4           | 7/1/1/1              |
| 30338  | Wright        | 2002 | Neuroreport                                                               | 1           | 6                    |
| 30369  | Blair         | 1999 | Brain                                                                     | 2           | 2/2                  |
| 30373  | Breiter       | 1996 | Neuron                                                                    | 2           | 8/2                  |
| 30388  | Kimbrell      | 1999 | Biological Psychiatry                                                     | 2           | 9/7                  |
| 30398  | Morris        | 1998 | Brain                                                                     | 3           | 4/5/3                |
| 30399  | Morris        | 1999 | Neuropsychologia                                                          | 1           | 8                    |
| 30400  | Morris        | 1996 | Nature                                                                    | 2           | 5/5                  |
| 30401  | Nakamura      | 1999 | Journal of Neurophysiology                                                | 1           | 5                    |
| 30406  | Phillips      | 1997 | Nature                                                                    | 5           | 3/3/3/14/2           |
| 30407  | Phillips      | 1998 | Proceedings of the Royal Society of London. Series B. Biological Sciences | 8           | 12/14/18/14/10/9/7/8 |
| 30408  | Phillips      | 1998 | Psychiatry Research                                                       | 1           | 9                    |
| 30416  | Sprengelmeyer | 1998 | Proceedings of the Royal Society of London. Series B. Biological Sciences | 3           | 3/3/3                |
| 30421  | Whalen        | 1998 | Journal of Neuroscience                                                   | 1           | 4                    |
| 30441  | George        | 1993 | Journal of Neuropsychiatry and Clinical Neuroscience                      | 2           | 11/4                 |

|         |             |      |                                                                    |    |                        |
|---------|-------------|------|--------------------------------------------------------------------|----|------------------------|
| 4040028 | Hall        | 2004 | Neuroreport                                                        | 2  | 3/1                    |
| 6030022 | Habel       | 2005 | NeuroImage                                                         | 4  | 14/8/6/5               |
| 6040034 | Winston     | 2003 | NeuroImage                                                         | 4  | 4/4/3/7                |
| 7020046 | Critchley   | 2000 | Human Brain Mapping                                                | 4  | 9/3/6/9                |
| 7020049 | Dolan       | 1996 | NeuroImage                                                         | 1  | 4                      |
| 7020065 | Wang        | 2004 | Journal of the American Academy of Child and Adolescent Psychiatry | 2  | 10/10                  |
| 7040121 | Habel       | 2007 | Neuropsychologia                                                   | 2  | 10/9                   |
| 7070183 | Malhi       | 2007 | Bipolar Disorders                                                  | 2  | 16/11                  |
| 7080231 | Williams    | 2001 | NeuroImage                                                         | 1  | 25                     |
| 7090251 | Vuilleumier | 2001 | Neuron                                                             | 1  | 7                      |
| 7110318 | Deeley      | 2007 | Biological Psychiatry                                              | 3  | 9/8/4                  |
| 8010023 | Deeley      | 2006 | British Journal of Psychiatry                                      | 2  | 6/8                    |
| 8080208 | Britton     | 2006 | NeuroImage                                                         | 10 | 4/4/3/6/6/5/3/4/3/4    |
| 8080226 | Lennox      | 2004 | Psychological Medicine                                             | 2  | 5/4                    |
| 8110270 | Holt        | 2006 | Schizophrenia Research                                             | 2  | 4/5                    |
| 8110275 | Jogia       | 2008 | British Journal of Psychiatry                                      | 1  | 6                      |
| 8110293 | Phillips    | 2004 | NeuroImage                                                         | 10 | 14/3/15/9/9/9/3/17/6/3 |
| 9010001 | Altshuler   | 2008 | Bipolar Disorders                                                  | 1  | 7                      |
| 9020042 | Keightley   | 2007 | Social Cognitive and Affective Neuroscience                        | 4  | 18/1/4/15              |
| 7050125 | Gu          | 2007 | NeuroImage                                                         | 1  | 6                      |
| 7060153 | Ogino       | 2007 | Cerebral Cortex                                                    | 1  | 14                     |
| 7100297 | Singer      | 2004 | Science                                                            | 3  | 23/11/10               |
| 7110330 | Moriguchi   | 2007 | Cerebral Cortex                                                    | 1  | 38                     |

|         |           |      |                  |   |         |
|---------|-----------|------|------------------|---|---------|
| 8020047 | Jackson   | 2006 | Neuropsychologia | 2 | 14/6    |
| 8110257 | Botvinick | 2005 | NeuroImage       | 1 | 17      |
| 8110273 | Jackson   | 2005 | NeuroImage       | 1 | 20      |
| 8110299 | Saarela   | 2007 | Cerebral Cortex  | 2 | 6/4     |
| 9010003 | Cheng     | 2007 | Current Biology  | 4 | 7/9/2/8 |

**Olfaction:**

| BMapID  | 1st Auth.  | Year | Journal                          | Experiments | Foci        |
|---------|------------|------|----------------------------------|-------------|-------------|
| 30053   | Poellinger | 2001 | NeuroImage                       | 2           | 27/18       |
| 30061   | Savic      | 2000 | Neuron                           | 3           | 5/2/7       |
| 30062   | Savic      | 2001 | Neuron                           | 6           | 4/2/3/4/1/3 |
| 30076   | Zatorre    | 2000 | Neuroreport                      | 1           | 5           |
| 30177   | Sobel      | 2000 | Journal of Neurophysiology       | 1           | 32          |
| 30304   | Bengtsson  | 2001 | Neuroreport                      | 5           | 2/3/2/2/1   |
| 7080212 | de Araujo  | 2003 | European Journal of Neuroscience | 2           | 11/7        |
| 7080226 | Rolls      | 2003 | European Journal of Neuroscience | 5           | 3/3/1/1/3   |
| 8050128 | Francis    | 1999 | Neuroreport                      | 1           | 7           |
| 8080172 | Ciomas     | 2008 | NeuroImage                       | 2           | 2/3         |
| 8110306 | Suzuki     | 2001 | Journal of Gerontology           | 2           | 15/2        |
| 8110311 | Zatorre    | 1992 | Nature                           | 1           | 6           |



**Gustation:**

| BMapID  | 1st Auth.  | Year | Journal                          | Experiments | Foci                   |
|---------|------------|------|----------------------------------|-------------|------------------------|
| 7070195 | Zald       | 2002 | Journal of Neurophysiology       | 3           | 7/7/5                  |
| 7070197 | de Araujo  | 2003 | Journal of Neurophysiology       | 2           | 5/1                    |
| 7080212 | de Araujo  | 2003 | European Journal of Neuroscience | 1           | 8                      |
| 7090252 | Zald       | 1998 | Brain                            | 1           | 8                      |
| 8010021 | Berns      | 2001 | Journal of Neuroscience          | 1           | 1                      |
| 8020060 | Schoenfeld | 2004 | Neuroscience                     | 5           | 2/2/2/1/1              |
| 8030076 | Haase      | 2007 | Journal of Neuroscience Methods  | 2           | 31/9                   |
| 8050128 | Francis    | 1999 | Neuroreport                      | 1           | 8                      |
| 8050137 | de Araujo  | 2004 | Journal of Neuroscience          | 2           | 4/1                    |
| 8100246 | Kobayashi  | 2004 | NeuroImage                       | 1           | 8                      |
| 8100250 | O'Doherty  | 2001 | Journal of Neurophysiology       | 2           | 14/10                  |
| 8100251 | Ogawa      | 2005 | Chemical Senses                  | 1           | 8                      |
| 8110303 | Small      | 2003 | Neuron                           | 9           | 18/14/16/14/3/2/2/26/4 |

**Interoception:**

| BMapID  | 1st Auth.  | Year | Journal                                         | Experiments | Foci          |
|---------|------------|------|-------------------------------------------------|-------------|---------------|
| 30111   | Arnow      | 2002 | Brain                                           | 1           | 21            |
| 30217   | Athwal     | 2001 | Brain                                           | 3           | 10/5/2        |
| 30253   | Brannan    | 2001 | Proceedings of the National Academy of Sciences | 3           | 23/12/11      |
| 30261   | Liotti     | 2001 | Proceedings of the National Academy of Sciences | 2           | 20/14         |
| 30264   | Parsons    | 2001 | Proceedings of the National Academy of Sciences | 5           | 16/13/2/11/7  |
| 30303   | Beauregard | 2001 | Journal of Neuroscience                         | 2           | 6/7           |
| 30322   | Karama     | 2002 | Human Brain Mapping                             | 2           | 18/14         |
| 30411   | Rauch      | 1999 | Psychiatry Research                             | 1           | 5             |
| 30412   | Redoute    | 2000 | Human Brain Mapping                             | 1           | 17            |
| 4020019 | Nunneley   | 2002 | Journal of Applied Physiology                   | 1           | 9             |
| 6040035 | Britton    | 2006 | NeuroImage                                      | 1           | 6             |
| 7030078 | Desseilles | 2006 | NeuroImage                                      | 2           | 11/7          |
| 7030083 | Porubska   | 2006 | NeuroImage                                      | 2           | 4/6           |
| 7040116 | Smeets     | 2006 | American Journal of Clinical Nutrition          | 2           | 12/6          |
| 7040117 | Uher       | 2006 | Behavioural Brain Research                      | 6           | 5/3/8/1/1/2   |
| 7070168 | Blok       | 1997 | Brain                                           | 2           | 7/5           |
| 7070169 | Blok       | 1998 | Brain                                           | 7           | 4/3/1/1/2/2/2 |
| 7070193 | Wu         | 1999 | American Journal of Psychiatry                  | 1           | 6             |
| 7080213 | de Araujo  | 2003 | Journal of Neurophysiology                      | 5           | 7/4/2/2/5     |
| 7080215 | Denton     | 1999 | Proceedings of the National Academy of Sciences | 1           | 14            |

|         |                 |      |                                                 |   |               |
|---------|-----------------|------|-------------------------------------------------|---|---------------|
| 7080216 | Egan            | 2003 | Proceedings of the National Academy of Sciences | 5 | 16/14/22/5/9  |
| 7080217 | Fukuyama        | 1996 | Neuroreport                                     | 1 | 4             |
| 7080218 | Kuhtz-Buschbeck | 2005 | Journal of Urology                              | 1 | 17            |
| 7080220 | Matsuura        | 2002 | Journal of Urology                              | 2 | 10/6          |
| 7080222 | Nour            | 2000 | Brain                                           | 1 | 35            |
| 7080228 | Seseke          | 2006 | NeuroImage                                      | 2 | 1/10          |
| 7090259 | Denton          | 1999 | Proceedings of the National Academy of Sciences | 4 | 14/9/6/10     |
| 7090261 | Farrell         | 2006 | Proceedings of the National Academy of Sciences | 1 | 18            |
| 7090273 | Yin             | 2006 | Journal of Nuclear Medicine                     | 2 | 4/15          |
| 8010010 | Killgore        | 2003 | NeuroImage                                      | 6 | 12/11/7/5/7/3 |
| 8010018 | Tataranni       | 1999 | Proceedings of the National Academy of Sciences | 2 | 19/4          |
| 8010033 | Safron          | 2007 | Behavioral Neuroscience                         | 4 | 34/1/15/3     |
| 8060141 | Ferretti        | 2005 | NeuroImage                                      | 5 | 28/28/18/10/8 |
| 8080228 | Mehnert         | 2008 | NeuroImage                                      | 3 | 17/18/6       |
| 8110277 | Kim             | 2006 | International Journal of Impotence Research     | 1 | 13            |
| 8110283 | Lowell          | 2008 | NeuroImage                                      | 1 | 15            |
| 8110287 | Miyagawa        | 2007 | NeuroImage                                      | 1 | 5             |
| 8110294 | Ponseti         | 2006 | NeuroImage                                      | 2 | 13/12         |
| 8110304 | Stark           | 2005 | Biological Psychology                           | 2 | 7/3           |
| 8110305 | Stoleru         | 1999 | Archives of Sexual Behavior                     | 2 | 6/2           |
| 8110307 | Tsujimura       | 2006 | Journal of Urology                              | 2 | 3/1           |
| 9010015 | McKay           | 2008 | NeuroImage                                      | 1 | 39            |
| 9010025 | Moulier         | 2006 | NeuroImage                                      | 5 | 31/21/21/24/3 |

**Pain:**

| BMapID  | 1st Auth.  | Year | Journal                                         | Experiments | Foci        |
|---------|------------|------|-------------------------------------------------|-------------|-------------|
| 30107   | Gelnar     | 1999 | NeuroImage                                      | 1           | 9           |
| 30122   | Coghill    | 1994 | Journal of Neuroscience                         | 2           | 14/3        |
| 30163   | Ploner     | 2000 | Journal of Neurophysiology                      | 1           | 3           |
| 30230   | Derbyshire | 1998 | Experimental Brain Research                     | 1           | 2           |
| 5040012 | Becerra    | 1999 | Magnetic Resonance in Medicine                  | 3           | 16/13/13    |
| 5040013 | Bingel     | 2002 | Pain                                            | 1           | 12          |
| 5040014 | Bornhovd   | 2002 | Brain                                           | 1           | 10          |
| 5040015 | Casey      | 1996 | Journal of Neurophysiology                      | 3           | 4/10/10     |
| 5040016 | Coghill    | 2001 | Journal of Neurophysiology                      | 4           | 54/42/35/37 |
| 5040017 | Coghill    | 1999 | Journal of Neurophysiology                      | 1           | 22          |
| 5040031 | Coghill    | 2003 | Proceedings of the National Academy of Sciences | 2           | 7/2         |
| 5040032 | Giesecke   | 2004 | Arthritis & Rheumatism                          | 1           | 7           |
| 5040033 | Ibinson    | 2004 | Anesthesiology                                  | 2           | 7/6         |
| 5040035 | Nemoto     | 2003 | Neuroreport                                     | 1           | 13          |
| 5040037 | Paulson    | 1998 | Pain                                            | 2           | 12/17       |
| 5040039 | Smith      | 2002 | British Journal of Psychiatry                   | 1           | 13          |
| 5040040 | Strigo     | 2003 | Journal of Neurophysiology                      | 2           | 21/25       |
| 5040041 | Svensson   | 1998 | European Journal of Pain                        | 3           | 10/9/9      |

|         |              |      |                                                                              |   |           |
|---------|--------------|------|------------------------------------------------------------------------------|---|-----------|
| 5040042 | Xu           | 1997 | Neuroreport                                                                  | 2 | 13/9      |
| 5040045 | Becerra      | 2001 | Neuron                                                                       | 2 | 31/9      |
| 5040046 | Bingel       | 2003 | NeuroImage                                                                   | 3 | 10/10/10  |
| 5040048 | Derbyshire   | 2002 | NeuroImage                                                                   | 1 | 11        |
| 5040049 | Derbyshire   | 1997 | Pain                                                                         | 1 | 17        |
| 5040050 | Derbyshire   | 2002 | Journal of Pain                                                              | 3 | 16/13/22  |
| 5040051 | Jones        | 1997 | Annals of the Rheumatic Diseases                                             | 1 | 6         |
| 5040053 | Lorenz       | 2002 | Neuron                                                                       | 1 | 8         |
| 5040056 | Svensson     | 1997 | Journal of Neurophysiology                                                   | 2 | 8/6       |
| 5040057 | Tolle        | 1999 | Annals of Neurology                                                          | 2 | 2/2       |
| 5040058 | Tracey       | 2000 | Neuroscience Letters                                                         | 1 | 25        |
| 5040062 | Casey        | 2001 | Journal of Neurophysiology                                                   | 2 | 6/16      |
| 5040063 | Derbyshire   | 1998 | Pain                                                                         | 1 | 12        |
| 7050136 | Frankenstein | 2001 | NeuroImage                                                                   | 1 | 10        |
| 7060163 | de Leeuw     | 2006 | Oral Surgery, Oral Medicine, Oral Pathology, Oral Radiology, and Endodontics | 1 | 16        |
| 7080221 | Mochizuki    | 2007 | NeuroImage                                                                   | 1 | 7         |
| 7080223 | Peyron       | 1999 | Brain                                                                        | 5 | 5/6/7/1/6 |
| 7080225 | Rolls        | 2003 | Cerebral Cortex                                                              | 1 | 15        |
| 7080236 | Petrovic     | 2002 | NeuroImage                                                                   | 2 | 1/6       |
| 7080238 | Valet        | 2004 | Pain                                                                         | 1 | 16        |
| 7090247 | Petrovic     | 2002 | Science                                                                      | 1 | 6         |
| 7090261 | Farrell      | 2006 | Proceedings of the National Academy of Sciences                              | 1 | 11        |

|         |           |      |                                  |   |          |
|---------|-----------|------|----------------------------------|---|----------|
| 7100297 | Singer    | 2004 | Science                          | 2 | 23/7     |
| 7110311 | Schmahl   | 2006 | Archives of General Psychiatry   | 2 | 13/14    |
| 7110322 | Geuze     | 2007 | Archives of General Psychiatry   | 2 | 23/22    |
| 8020051 | Maihofner | 2007 | European Journal of Neuroscience | 1 | 12       |
| 8110257 | Botvinick | 2005 | NeuroImage                       | 1 | 11       |
| 8110271 | Iadarola  | 1998 | Brain                            | 3 | 25/27/14 |

**Somatosensation:**

| BMapID | 1st Auth.     | Year | Journal                          | Experiments | Foci |
|--------|---------------|------|----------------------------------|-------------|------|
| 30047  | Naito         | 2000 | Journal of Neurophysiology       | 1           | 2    |
| 30048  | Naito         | 1999 | Journal of Neuroscience          | 2           | 4/2  |
| 30107  | Gelnar        | 1999 | NeuroImage                       | 1           | 6    |
| 30122  | Coghill       | 1994 | Journal of Neuroscience          | 1           | 5    |
| 30127  | Deuchert      | 2002 | Neuroreport                      | 2           | 2/2  |
| 30142  | Johansen-Berg | 2000 | Neuroreport                      | 1           | 5    |
| 30150  | Lepage        | 2001 | NeuroImage                       | 1           | 26   |
| 30163  | Ploner        | 2000 | Journal of Neurophysiology       | 1           | 4    |
| 30171  | Seitz         | 1992 | Acta Neurologica Scandinavica    | 1           | 14   |
| 30172  | Seitz         | 1991 | European Journal of Neuroscience | 1           | 21   |
| 30293  | Kitada        | 2003 | Neuroreport                      | 1           | 5    |
| 30339  | Yoo           | 2003 | Neuroreport                      | 2           | 8/6  |

|         |           |      |                                   |   |         |
|---------|-----------|------|-----------------------------------|---|---------|
| 4040021 | Bodegard  | 2000 | Neuroreport                       | 1 | 9       |
| 4040022 | Burton    | 1997 | Cerebral Cortex                   | 2 | 6/4     |
| 4040023 | Burton    | 1999 | Cerebral Cortex                   | 1 | 5       |
| 4040026 | Francis   | 2000 | NeuroImage                        | 2 | 1/1     |
| 4040027 | Hagen     | 2002 | Journal of Neurophysiology        | 4 | 5/6/4/4 |
| 5040029 | Blakemore | 1999 | NeuroImage                        | 2 | 6/6     |
| 5040036 | Numminen  | 2004 | NeuroImage                        | 1 | 25      |
| 5040043 | Yoo       | 2004 | NeuroImage                        | 1 | 10      |
| 5040053 | Lorenz    | 2002 | Neuron                            | 1 | 11      |
| 6050054 | Hlushchuk | 2006 | Journal of Neuroscience           | 2 | 5/4     |
| 6110179 | Hagen     | 2002 | European Journal of Neuroscience  | 1 | 9       |
| 7010022 | Kitada    | 2005 | NeuroImage                        | 1 | 21      |
| 7020041 | Zhang     | 2005 | Human Brain Mapping               | 1 | 11      |
| 7080225 | Rolls     | 2003 | Cerebral Cortex                   | 2 | 7/5     |
| 7110346 | Eickhoff  | 2006 | NeuroImage                        | 1 | 3       |
| 8050120 | Carlsson  | 2000 | Journal of Cognitive Neuroscience | 2 | 12/10   |
| 8050128 | Francis   | 1999 | Neuroreport                       | 1 | 7       |
| 8110269 | Hobday    | 2001 | Brain                             | 1 | 15      |
| 8110271 | Iadarola  | 1998 | Brain                             | 1 | 14      |
| 8110283 | Lowell    | 2008 | NeuroImage                        | 1 | 34      |
| 6110180 | Hui       | 2005 | NeuroImage                        | 1 | 58      |
| 8110282 | Lotze     | 2001 | NeuroImage                        | 1 | 12      |

---

**Motion:**

| BMapID | 1st Auth. | Year | Journal                            | Experiments | Foci              |
|--------|-----------|------|------------------------------------|-------------|-------------------|
| 30016  | Desmurget | 2001 | Journal of Neuroscience            | 1           | 14                |
| 30020  | Ehrsson   | 2000 | European Journal of Neuroscience   | 7           | 9/14/17/5/4/13/3  |
| 30022  | Gosain    | 2001 | Plastic and Reconstructive Surgery | 2           | 2/2               |
| 30033  | Indovina  | 2001 | Experimental Brain Research        | 3           | 15/23/10          |
| 30054  | Rao       | 1997 | Journal of Neuroscience            | 4           | 3/7/3/7           |
| 30078  | van Mier  | 1998 | Journal of Neurophysiology         | 6           | 28/28/12/12/12/12 |
| 30082  | Gerardin  | 2000 | Cerebral Cortex                    | 2           | 24/18             |
| 30103  | Simon     | 2002 | Neuron                             | 2           | 16/16             |
| 30107  | Gelnar    | 1999 | NeuroImage                         | 1           | 8                 |
| 30123  | Colebatch | 1991 | Journal of Neurophysiology         | 4           | 3/12/8/5          |
| 30137  | Grafton   | 1993 | Experimental Brain Research        | 4           | 3/3/3/3           |
| 30151  | Lotze     | 2000 | Neuroreport                        | 2           | 2/2               |
| 30187  | Winstein  | 1997 | Journal of Neurophysiology         | 1           | 19                |
| 30229  | Corfield  | 1999 | Journal of Applied Physiology      | 1           | 17                |
| 30254  | Carey     | 2000 | NeuroImage                         | 2           | 3/3               |
| 30279  | Kawashima | 2000 | NeuroImage                         | 1           | 12                |
| 30300  | Umetsu    | 2002 | NeuroImage                         | 4           | 3/6/8/13          |
| 30306  | Binkofski | 2000 | Human Brain Mapping                | 2           | 9/8               |
| 30318  | Inoue     | 2001 | NeuroImage                         | 4           | 3/4/3/4           |



|         |             |      |                                               |   |                   |
|---------|-------------|------|-----------------------------------------------|---|-------------------|
| 30356   | Menon       | 2001 | Human Brain Mapping                           | 1 | 7                 |
| 30425   | Casey       | 1998 | NeuroImage                                    | 1 | 11                |
| 30437   | Ehrsson     | 2001 | Journal of Neurophysiology                    | 1 | 28                |
| 4020006 | Grafton     | 1992 | Journal of Neuroscience                       | 1 | 11                |
| 4040033 | Maldjian    | 1998 | NeuroImage                                    | 1 | 2                 |
| 5070065 | Blinkenberg | 1996 | Journal of Cerebral Blood Flow and Metabolism | 1 | 10                |
| 5070072 | Catalan     | 1998 | Brain                                         | 1 | 9                 |
| 5070085 | Joliot      | 1998 | NeuroImage                                    | 1 | 13                |
| 5070091 | Lerner      | 2004 | NeuroImage                                    | 2 | 9/4               |
| 5070101 | Ramsey      | 1996 | Journal of Cerebral Blood Flow and Metabolism | 1 | 1                 |
| 5070120 | Astafiev    | 2003 | Journal of Neuroscience                       | 3 | 25/10/4           |
| 5070131 | Connolly    | 2000 | Journal of Neurophysiology                    | 2 | 14/20             |
| 6020017 | Watanabe    | 2004 | NeuroImage                                    | 3 | 18/17/11          |
| 6060081 | De Luca     | 2005 | Experimental Brain Research                   | 1 | 4                 |
| 6070107 | Wilson      | 2004 | Nature Neuroscience                           | 1 | 2                 |
| 6080140 | Nowak       | 2005 | Human Brain Mapping                           | 1 | 14                |
| 7050129 | Wong        | 2007 | NeuroImage                                    | 1 | 25                |
| 7060151 | Mallol      | 2007 | Brain Research                                | 1 | 17                |
| 7060152 | Milner      | 2007 | NeuroImage                                    | 2 | 2/7               |
| 7070175 | Ghatan      | 1995 | NeuroImage                                    | 1 | 16                |
| 7090258 | Blok        | 1997 | Journal of Comparative Neurology              | 1 | 7                 |
| 7110303 | Gavazzi     | 2007 | Journal of Computer Assisted Tomography       | 1 | 3                 |
| 7110327 | Lissek      | 2007 | NeuroImage                                    | 6 | 48/29/15/14/37/28 |

|         |           |      |                                               |   |            |
|---------|-----------|------|-----------------------------------------------|---|------------|
| 7120370 | Simon     | 2004 | NeuroImage                                    | 1 | 15         |
| 7120388 | Leslie    | 2004 | NeuroImage                                    | 1 | 23         |
| 8020052 | Martin    | 2004 | Journal of Neurophysiology                    | 3 | 15/23/13   |
| 8020053 | Mostofsky | 2006 | Biological Psychiatry                         | 2 | 3/4        |
| 8020054 | Onozuka   | 2002 | Journal of Dental Research                    | 2 | 10/10      |
| 8020055 | Onozuka   | 2003 | Journal of Dental Research                    | 2 | 6/6        |
| 8020062 | Stephan   | 1995 | Journal of Neurophysiology                    | 2 | 41/21      |
| 8020068 | Brown     | 2008 | Cerebral Cortex                               | 2 | 15/11      |
| 8020071 | Gerardin  | 2003 | Cerebral Cortex                               | 4 | 10/14/9/18 |
| 8030084 | Hamdy     | 1999 | Journal of Neurophysiology                    | 1 | 9          |
| 8030085 | Harris    | 2005 | Journal of Cerebral Blood Flow and Metabolism | 1 | 17         |
| 8030088 | Wild      | 2003 | Psychiatry Research                           | 1 | 4          |
| 8080201 | Fesl      | 2003 | NeuroImage                                    | 1 | 8          |
| 8080202 | Rotte     | 2002 | Stereotactic and Functional Neurosurgery      | 3 | 16/16/12   |
| 8080222 | Hanakawa  | 2008 | Cerebral Cortex                               | 2 | 13/11      |
| 8110286 | Martin    | 2001 | Journal of Neurophysiology                    | 1 | 9          |
| 9010004 | Dziewas   | 2003 | NeuroImage                                    | 2 | 9/4        |
| 9010006 | Fraser    | 2002 | Neuron                                        | 1 | 8          |
| 9010007 | Furlong   | 2004 | NeuroImage                                    | 1 | 4          |
| 9010008 | Guillot   | 2008 | Human Brain Mapping                           | 1 | 39         |
| 9010014 | Martin    | 2007 | Experimental Brain Research                   | 2 | 33/24      |
| 9020028 | Bengtsson | 2005 | European Journal of Neuroscience              | 1 | 11         |

---

**Attention:**

| BMapID | 1st Auth.     | Year | Journal                                         | Experiments | Foci      |
|--------|---------------|------|-------------------------------------------------|-------------|-----------|
| 30001  | Anderson      | 2000 | Journal of Cognitive Neuroscience               | 2           | 18/14     |
| 30002  | Arrington     | 2000 | Journal of Cognitive Neuroscience               | 2           | 15/6      |
| 30010  | Bush          | 1998 | Human Brain Mapping                             | 1           | 7         |
| 30058  | Rosen         | 1999 | Journal of Cognitive Neuroscience               | 4           | 14/13/8/4 |
| 30059  | Rushworth     | 2001 | Journal of Neuroscience                         | 2           | 16/9      |
| 30069  | Sturm         | 1999 | Neuropsychologia                                | 1           | 10        |
| 30103  | Simon         | 2002 | Neuron                                          | 3           | 23/12/1   |
| 30124  | Corbetta      | 1991 | Journal of Neuroscience                         | 1           | 3         |
| 30134  | Gitelman      | 2002 | NeuroImage                                      | 1           | 22        |
| 30142  | Johansen-Berg | 2000 | Neuroreport                                     | 3           | 3/5/3     |
| 30210  | Steel         | 2001 | Neuroreport                                     | 3           | 26/32/14  |
| 30228  | Carter        | 1995 | NeuroImage                                      | 3           | 6/4/7     |
| 30230  | Derbyshire    | 1998 | Experimental Brain Research                     | 1           | 2/        |
| 30231  | MacDonald     | 2000 | Science                                         | 2           | 1/5       |
| 30233  | Pardo         | 1990 | Proceedings of the National Academy of Sciences | 1           | 13        |
| 30236  | Ruff          | 2001 | NeuroImage                                      | 4           | 10/7/7/16 |
| 30237  | Whalen        | 1998 | Biological Psychiatry                           | 1           | 10        |
| 30239  | de Zubicaray  | 2001 | Human Brain Mapping                             | 1           | 9         |
| 30240  | Banich        | 2000 | Journal of Cognitive Neuroscience               | 4           | 6/8/7/9   |

|         |           |      |                                                         |   |                   |
|---------|-----------|------|---------------------------------------------------------|---|-------------------|
| 30248   | Peterson  | 2002 | Cognitive Brain Research                                | 2 | 14/14             |
| 30252   | Bench     | 1993 | Neuropsychologia                                        | 5 | 6/2/2/5/1         |
| 30256   | George    | 1994 | Human Brain Mapping                                     | 1 | 10                |
| 30262   | Marois    | 2000 | Neuron                                                  | 1 | 8                 |
| 30266   | Shaywitz  | 2001 | NeuroImage                                              | 3 | 18/19/12          |
| 30267   | Stevens   | 2000 | Magnetic Resonance Imaging                              | 2 | 23/20             |
| 30285   | O'Leary   | 2002 | Neuropsychopharmacology                                 | 1 | 2                 |
| 30295   | Marois    | 2000 | Neuron                                                  | 1 | 20                |
| 30308   | Brown     | 1999 | Journal of the International Neuropsychological Society | 2 | 4/4               |
| 30310   | Fan       | 2003 | NeuroImage                                              | 4 | 14/14/11/14       |
| 30327   | Leung     | 2000 | Cerebral Cortex                                         | 1 | 16                |
| 30328   | Mead      | 2002 | Journal of the International Neuropsychological Society | 2 | 1/1               |
| 30333   | Taylor    | 1997 | NeuroImage                                              | 3 | 12/9/11           |
| 30342   | Brass     | 2001 | NeuroImage                                              | 1 | 5                 |
| 30360   | Peterson  | 1999 | Biological Psychiatry                                   | 1 | 40                |
| 30386   | Milham    | 2002 | Brain and Cognition                                     | 1 | 14                |
| 30444   | Jonides   | 1997 | Journal of Cognitive Neuroscience                       | 1 | 2                 |
| 30463   | Milham    | 2001 | Cognitive Brain Research                                | 1 | 7                 |
| 5040009 | Konishi   | 2002 | Proceedings of the National Academy of Sciences         | 2 | 16/9              |
| 5070073 | Corbetta  | 2000 | Nature Neuroscience                                     | 3 | 8/8/5             |
| 5070074 | Corbetta  | 1998 | Neuron                                                  | 2 | 21/19             |
| 5070078 | Gitelman  | 1999 | Brain                                                   | 1 | 16                |
| 5070081 | Hopfinger | 2000 | Nature Neuroscience                                     | 6 | 18/18/18/21/21/21 |

|         |             |      |                             |   |          |
|---------|-------------|------|-----------------------------|---|----------|
| 5070090 | LaBar       | 1999 | NeuroImage                  | 2 | 26/8     |
| 5070093 | Milham      | 2005 | Human Brain Mapping         | 2 | 38/23    |
| 5070106 | Thiel       | 2004 | NeuroImage                  | 3 | 7/2/1    |
| 5070116 | Winterer    | 2002 | NeuroImage                  | 1 | 21       |
| 5070120 | Astafiev    | 2003 | Journal of Neuroscience     | 2 | 12/1     |
| 5070121 | Beauchamp   | 2001 | NeuroImage                  | 1 | 12       |
| 5070124 | Berman      | 1995 | Neuropsychologia            | 1 | 35       |
| 5070137 | Goldberg    | 1998 | NeuroImage                  | 2 | 17/7     |
| 5070158 | Nagahama    | 1996 | Brain                       | 1 | 19       |
| 5070159 | Nagahama    | 2001 | Cerebral Cortex             | 1 | 14       |
| 5070160 | Nagahama    | 1997 | Experimental Brain Research | 1 | 26       |
| 5070165 | Peelen      | 2004 | NeuroImage                  | 1 | 8        |
| 5070170 | Ragland     | 1998 | Neuropsychology             | 1 | 1        |
| 5080208 | Banich      | 2000 | Cognitive Brain Research    | 2 | 4/3      |
| 5080209 | Cools       | 2004 | Journal of Neuroscience     | 1 | 11       |
| 5080210 | DiGirolamo  | 2001 | Neuroreport                 | 3 | 68/31/11 |
| 5080211 | Dove        | 2000 | Cognitive Brain Research    | 1 | 13       |
| 5080212 | Kimberg     | 2000 | Cognitive Brain Research    | 1 | 9        |
| 5080213 | Kringelbach | 2003 | NeuroImage                  | 2 | 7/5      |
| 5080214 | Milham      | 2003 | Cognitive Brain Research    | 3 | 16/16/25 |
| 5080215 | Nakahara    | 2002 | Science                     | 1 | 13       |
| 5080217 | Omori       | 1999 | Neuroscience Research       | 2 | 18/12    |
| 5080218 | Pollmann    | 2000 | Human Brain Mapping         | 1 | 6        |

|         |           |      |                                       |   |                   |
|---------|-----------|------|---------------------------------------|---|-------------------|
| 5080219 | Potenza   | 2003 | American Journal of Psychiatry        | 2 | 10/1              |
| 5080220 | Smith     | 2004 | Human Brain Mapping                   | 1 | 10                |
| 5080221 | Swainson  | 2003 | Journal of Cognitive Neuroscience     | 3 | 1/3/2             |
| 5090222 | Banich    | 2001 | Progress in Brain Research            | 2 | 79                |
| 5090223 | Brass     | 2002 | Cerebral Cortex                       | 3 | 21                |
| 5090224 | Brass     | 2004 | Journal of Cognitive Neuroscience     | 3 | 3/4/3             |
| 5090225 | Braver    | 2003 | Neuron                                | 5 | 5/5/3/3/8         |
| 5090227 | Dreher    | 2003 | Cerebral Cortex                       | 4 | 14/25/9/9         |
| 5090228 | Dreher    | 2002 | NeuroImage                            | 1 | 9                 |
| 5090236 | Luks      | 2002 | NeuroImage                            | 8 | 13/12/6/4/3/4/2/2 |
| 5090241 | Rushworth | 2002 | Journal of Neurophysiology            | 2 | 4/2               |
| 5090243 | Sylvester | 2003 | Neuropsychologia                      | 5 | 14/11/8/12/4      |
| 5100245 | Zysset    | 2001 | NeuroImage                            | 3 | 9/6/4             |
| 6070103 | Kerns     | 2005 | American Journal of Psychiatry        | 2 | 13/13             |
| 6080108 | Heckers   | 2004 | American Journal of Psychiatry        | 1 | 9                 |
| 6080109 | Jeong     | 2005 | Psychiatry Research                   | 1 | 9                 |
| 6080112 | Weiss     | 2003 | Psychiatry Research                   | 3 | 9/7/9             |
| 6080126 | Mendrek   | 2004 | British Journal of Psychiatry         | 1 | 2                 |
| 7010020 | Eyler     | 2004 | Psychiatry Research                   | 1 | 4                 |
| 7020042 | Bedwell   | 2005 | International Journal of Neuroscience | 1 | 19                |
| 7020053 | Fink      | 1997 | Brain                                 | 4 | 1/1/2/2           |
| 7020054 | Gurd      | 2002 | Brain                                 | 1 | 2                 |
| 7020067 | Weiss     | 2007 | Psychiatry Research                   | 2 | 14/17             |

|         |                      |      |                                                      |   |                |
|---------|----------------------|------|------------------------------------------------------|---|----------------|
| 7020068 | Barch                | 2001 | Cerebral Cortex                                      | 4 | 5/5/6/6        |
| 7040095 | Dichter              | 2007 | NeuroImage                                           | 2 | 8/8            |
| 7040113 | Ravnkilde            | 2002 | Journal of Clinical and Experimental Neuropsychology | 1 | 8              |
| 7050136 | Frankenstein         | 2001 | NeuroImage                                           | 2 | 5/6            |
| 7060159 | Tang                 | 2006 | Journal of Cognitive Neuroscience                    | 6 | 10/11/1/18/7/5 |
| 7060161 | Wrase                | 2007 | NeuroImage                                           | 3 | 2/3/1          |
| 7070171 | Durstun              | 2003 | NeuroImage                                           | 2 | 4/1            |
| 7070172 | Fiehler              | 2004 | European Journal of Neuroscience                     | 2 | 5/7            |
| 7070177 | Gur                  | 2007 | Human Brain Mapping                                  | 2 | 26/14          |
| 7070179 | Hazeltine            | 2003 | Neuropsychologia                                     | 1 | 5              |
| 7070185 | Pfefferbaum          | 2001 | NeuroImage                                           | 1 | 10             |
| 7080198 | Fitzgerald           | 2005 | Biological Psychiatry                                | 3 | 13/1/1         |
| 7080202 | Nakao                | 2005 | Psychiatry Research                                  | 1 | 27             |
| 7080210 | Wagner               | 2006 | Biological Psychiatry                                | 1 | 2              |
| 7080211 | Yucel                | 2007 | Archives of General Psychiatry                       | 1 | 15             |
| 7080219 | Maltby               | 2005 | NeuroImage                                           | 2 | 8/5            |
| 7080229 | Ullsperger           | 2001 | NeuroImage                                           | 2 | 34/14          |
| 7090249 | Phelps               | 2004 | Neuron                                               | 6 | 6/8/44/4/11    |
| 7090251 | Vuilleumier          | 2001 | Neuron                                               | 1 | 1              |
| 7090253 | Buchel               | 1999 | Journal of Neuroscience                              | 1 | 11             |
| 7090263 | Georgiou-Karistianis | 2007 | Neuropsychologia                                     | 1 | 8              |
| 7090264 | Kerns                | 2006 | NeuroImage                                           | 1 | 5              |
| 7090265 | Liu                  | 2004 | NeuroImage                                           | 2 | 34/15          |

|         |           |      |                                    |   |                  |
|---------|-----------|------|------------------------------------|---|------------------|
| 7090266 | Maclin    | 2001 | Neuroreport                        | 1 | 5                |
| 7090271 | Rubia     | 2006 | Human Brain Mapping                | 3 | 11/9/7           |
| 7090272 | Wittfoth  | 2006 | NeuroImage                         | 5 | 10/10/6/5/7      |
| 7100280 | Rogers    | 2000 | Journal of Cognitive Neuroscience  | 8 | 13/4/5/4/3/6/3/3 |
| 7120370 | Simon     | 2004 | NeuroImage                         | 1 | 9                |
| 8010020 | Bayless   | 2006 | Neuroscience Letters               | 2 | 4/6              |
| 8010036 | Stern     | 2007 | Brain Research                     | 3 | 12/4/12          |
| 8050120 | Carlsson  | 2000 | Journal of Cognitive Neuroscience  | 1 | 8                |
| 8050125 | Elliott   | 1997 | Neuropsychologia                   | 1 | 10               |
| 8110256 | Berpohl   | 2006 | Human Brain Mapping                | 1 | 10               |
| 9010005 | Forstmann | 2008 | Journal of Cognitive Neuroscience  | 2 | 6/2              |
| 9010017 | Sommer    | 2008 | Acta Neurobiologiae Experimentalis | 1 | 11               |
| 9010024 | Wittfoth  | 2008 | Brain Research                     | 3 | 14/8/14          |
| 9020033 | Coull     | 2004 | Science                            | 2 | 11/5             |

---

**Language:**

| BMapID | 1st Auth. | Year | Journal                                         | Experiments | Foci    |
|--------|-----------|------|-------------------------------------------------|-------------|---------|
| 30006  | Binder    | 1996 | Brain                                           | 2           | 1/6     |
| 30008  | Buckner   | 2000 | Brain                                           | 2           | 7/7     |
| 30018  | Duzel     | 2001 | Human Brain Mapping                             | 4           | 2/2/2/1 |
| 30019  | Duzel     | 1999 | Proceedings of the National Academy of Sciences | 1           | 2       |



|       |              |      |                                                 |   |             |
|-------|--------------|------|-------------------------------------------------|---|-------------|
| 30035 | Kiehl        | 2002 | NeuroImage                                      | 1 | 12          |
| 30036 | Klein        | 2001 | NeuroImage                                      | 2 | 13/17       |
| 30079 | Booth        | 2002 | Human Brain Mapping                             | 2 | 15/11       |
| 30080 | Dehaene      | 2001 | Nature Neuroscience                             | 4 | 15/6/2/3    |
| 30091 | Le Clec      | 2000 | NeuroImage                                      | 2 | 4/3         |
| 30103 | Simon        | 2002 | Neuron                                          | 1 | 7           |
| 30104 | Skosnik      | 2002 | NeuroImage                                      | 3 | 2/5/3       |
| 30112 | Belin        | 2000 | Nature                                          | 1 | 11          |
| 30114 | Binder       | 2000 | Cerebral Cortex                                 | 1 | 8           |
| 30119 | Calvert      | 2003 | Journal of Cognitive Neuroscience               | 4 | 31/25/21/7  |
| 30136 | Grady        | 1998 | Proceedings of the National Academy of Sciences | 2 | 4/5         |
| 30149 | Kuperberg    | 2000 | Journal of Cognitive Neuroscience               | 4 | 11/10/13/17 |
| 30155 | Meyer        | 2002 | Human Brain Mapping                             | 2 | 2/6         |
| 30164 | Poldrack     | 1999 | NeuroImage                                      | 2 | 19/7        |
| 30167 | Roskies      | 2001 | Journal of Cognitive Neuroscience               | 5 | 22/1/4/3/5  |
| 30174 | Shaywitz     | 1995 | Human Brain Mapping                             | 2 | 15/11       |
| 30206 | Mechelli     | 2000 | Journal of Cognitive Neuroscience               | 3 | 11/18/1     |
| 30232 | Noppeney     | 2002 | NeuroImage                                      | 1 | 7           |
| 30234 | Phillips     | 2002 | Brain                                           | 4 | 6/3/1/2     |
| 30239 | de Zubicaray | 2001 | Human Brain Mapping                             | 1 | 9           |
| 30247 | Petersen     | 1988 | Nature                                          | 4 | 5/6/5/3     |
| 30257 | Hagoort      | 1999 | Journal of Cognitive Neuroscience               | 3 | 7/9/8       |
| 30258 | Herbster     | 1997 | Human Brain Mapping                             | 4 | 6/3/6/7     |

|       |            |      |                                                                           |   |             |
|-------|------------|------|---------------------------------------------------------------------------|---|-------------|
| 30276 | Dapretto   | 1999 | Neuron                                                                    | 4 | 8/8/1/1     |
| 30285 | O'Leary    | 2002 | Neuropsychopharmacology                                                   | 1 | 2           |
| 30286 | O'Leary    | 2000 | Neuroreport                                                               | 3 | 3/2/2       |
| 30313 | Gandour    | 2003 | Human Brain Mapping                                                       | 2 | 8/6         |
| 30334 | Thierry    | 2003 | Human Brain Mapping                                                       | 2 | 15/18       |
| 30347 | Devlin     | 2003 | Journal of Cognitive Neuroscience                                         | 3 | 26/5/34     |
| 30349 | Kang       | 1999 | NeuroImage                                                                | 2 | 7/7         |
| 30355 | Lurito     | 2000 | Human Brain Mapping                                                       | 2 | 7/15        |
| 30358 | Muller     | 1997 | Neuroreport                                                               | 2 | 7/8         |
| 30367 | Beauregard | 1997 | Journal of Cognitive Neuroscience                                         | 4 | 18/17/14/22 |
| 30376 | Curtis     | 1998 | American Journal of Psychiatry                                            | 2 | 9/7         |
| 30378 | De Nil     | 2003 | Journal of Fluency Disorders                                              | 1 | 6           |
| 30382 | Friston    | 1995 | NeuroImage                                                                | 1 | 10          |
| 30414 | Remy       | 2003 | NeuroImage                                                                | 1 | 13          |
| 30417 | Stippich   | 2003 | Neuroscience Letters                                                      | 2 | 4/4         |
| 30423 | Brammer    | 1997 | Magnetic Resonance Imaging                                                | 2 | 6/6         |
| 30432 | Curtis     | 1999 | Schizophrenia Research                                                    | 1 | 18          |
| 30434 | Demonet    | 1992 | Brain                                                                     | 3 | 7/14/9      |
| 30435 | Demonet    | 1994 | Brain                                                                     | 4 | 3/5/1/5     |
| 30439 | Frith      | 1991 | Proceedings of the Royal Society of London. Series B. Biological Sciences | 1 | 2           |
| 30446 | Kuo        | 2001 | Neuroreport                                                               | 2 | 32/15       |
| 30454 | Schlosser  | 1998 | Journal of Neurology, Neurosurgery, and Psychiatry                        | 2 | 11/9        |

|         |                 |      |                                                                           |   |                           |
|---------|-----------------|------|---------------------------------------------------------------------------|---|---------------------------|
| 4020005 | Fiez            | 1996 | Journal of Neuroscience                                                   | 1 | 24                        |
| 4020008 | Howard          | 1992 | Brain                                                                     | 2 | 2/2                       |
| 4020011 | Price           | 1994 | Brain                                                                     | 2 | 12/6                      |
| 4020012 | Price           | 1996 | Brain                                                                     | 2 | 3/4                       |
| 4020017 | Zurowski        | 2002 | NeuroImage                                                                | 1 | 3                         |
| 4040039 | Okada           | 2003 | Neuropsychobiology                                                        | 1 | 8                         |
| 4090059 | De Nil          | 2000 | Journal of Speech, Language, and Hearing Research                         | 1 | 5                         |
| 5040003 | Chao            | 2002 | Cerebral Cortex                                                           | 4 | 7/5/5/9                   |
| 5040004 | Chao            | 2000 | NeuroImage                                                                | 1 | 3                         |
| 5040018 | Martin          | 1996 | Nature                                                                    | 2 | 8/9                       |
| 5040020 | Price           | 2003 | Brain and Language                                                        | 1 | 4                         |
| 5040021 | Price           | 1996 | Proceedings of the Royal Society of London. Series B. Biological Sciences | 4 | 5/7/7/3                   |
| 5040022 | Renvall         | 2003 | Applied Neuropsychology                                                   | 1 | 15                        |
| 5040023 | Smith           | 2001 | Journal of Neuroimaging                                                   | 3 | 16/16/4                   |
| 5040024 | Thompson-Schill | 1999 | Neuropsychologia                                                          | 4 | 5/2/4/5                   |
| 5040025 | Tyler           | 2004 | Journal of Cognitive Neuroscience                                         | 2 | 7/6                       |
| 5040026 | Vandenberghe    | 1996 | Nature                                                                    | 2 | 11/11                     |
| 5040027 | Vingerhoets     | 2003 | NeuroImage                                                                | 9 | 12/13/12/10/18/16/5/10/11 |
| 5040028 | Zelkowitz       | 1998 | Journal of the International Neuropsychological Society                   | 1 | 8                         |
| 5040054 | Maguire         | 2004 | NeuroImage                                                                | 3 | 9/2/7                     |
| 5070068 | Booth           | 2004 | Journal of Cognitive Neuroscience                                         | 3 | 9/9/11                    |
| 5070076 | Damasio         | 1996 | Nature                                                                    | 9 | 3/2/3/2/1/3/3/3/3         |

|         |              |      |                                                 |   |             |
|---------|--------------|------|-------------------------------------------------|---|-------------|
| 5070095 | Moore        | 1999 | NeuroImage                                      | 6 | 5/7/5/6/4/4 |
| 5070099 | Poeppel      | 2004 | Neuropsychologia                                | 4 | 37/26/26/23 |
| 5070113 | Votaw        | 1999 | NeuroImage                                      | 2 | 16/11       |
| 5070114 | Vouloumanos  | 2001 | Journal of Cognitive Neuroscience               | 2 | 10/8        |
| 5070126 | Binder       | 2003 | Journal of Cognitive Neuroscience               | 1 | 26          |
| 5070130 | Cohen        | 2003 | Cerebral Cortex                                 | 3 | 11/7/2      |
| 5070135 | Fiebach      | 2002 | Journal of Cognitive Neuroscience               | 1 | 14          |
| 5070166 | Petersen     | 1989 | Journal of Cognitive Neuroscience               | 2 | 6/6         |
| 5070167 | Petersen     | 1990 | Science                                         | 2 | 1/3         |
| 5080189 | Poldrack     | 2001 | Journal of Cognitive Neuroscience               | 1 | 2           |
| 5080190 | Price        | 1997 | Journal of Cognitive Neuroscience               | 2 | 3/6         |
| 5080192 | Siok         | 2004 | Nature                                          | 2 | 12/17       |
| 6050042 | Calarge      | 2003 | American Journal of Psychiatry                  | 1 | 13          |
| 6050053 | Henke        | 1999 | Proceedings of the National Academy of Sciences | 1 | 7           |
| 6050060 | Peck         | 2004 | NeuroImage                                      | 1 | 13          |
| 6050071 | Riecker      | 2000 | Neuroreport                                     | 1 | 3           |
| 6060082 | Drobyshevsky | 2006 | NeuroImage                                      | 1 | 9           |
| 6060084 | Hamzei       | 2003 | NeuroImage                                      | 1 | 4           |
| 6060098 | Rowan        | 2004 | NeuroImage                                      | 1 | 13          |
| 6060099 | Saccuman     | 2006 | NeuroImage                                      | 4 | 3/15/12/7   |
| 6080122 | Kumari       | 2003 | Biological Psychiatry                           | 5 | 9/4/3/4/19  |
| 6110182 | Mo           | 2005 | Human Brain Mapping                             | 2 | 6/9         |
| 6120186 | Poldrack     | 2001 | Brain                                           | 1 | 13          |

|         |              |      |                                                                           |   |             |
|---------|--------------|------|---------------------------------------------------------------------------|---|-------------|
| 6120187 | Poldrack     | 1998 | Cerebral Cortex                                                           | 1 | 11          |
| 7010010 | Martin       | 1995 | Science                                                                   | 2 | 8/10        |
| 7010011 | Paulesu      | 1997 | Neuroreport                                                               | 4 | 4/5/1/1     |
| 7010012 | Pihlajamaki  | 2000 | Annals of Neurology                                                       | 1 | 9           |
| 7010013 | Shapiro      | 2006 | Proceedings of the National Academy of Sciences                           | 2 | 3/4         |
| 7010015 | Tranel       | 2005 | Brain and Language                                                        | 6 | 2/2/3/4/4/5 |
| 7010017 | Vitali       | 2005 | Brain and Language                                                        | 2 | 28/27       |
| 7020054 | Gurd         | 2002 | Brain                                                                     | 1 | 8           |
| 7020055 | Katzir       | 2005 | NeuroImage                                                                | 3 | 11/12/9     |
| 7020056 | Kemeny       | 2005 | Human Brain Mapping                                                       | 1 | 10          |
| 7020073 | Voets        | 2006 | Brain                                                                     | 2 | 8/14        |
| 7020074 | Mummery      | 1996 | Proceedings of the Royal Society of London. Series B. Biological Sciences | 4 | 3/3/3/2     |
| 7030076 | Audenaert    | 2000 | European Journal of Nuclear Medicine                                      | 2 | 7/6         |
| 7030080 | Fu           | 2005 | American Journal of Psychiatry                                            | 1 | 1           |
| 7030081 | Fu           | 2002 | NeuroImage                                                                | 2 | 29/39       |
| 7030088 | Allen        | 2006 | Psychopharmacology                                                        | 1 | 6           |
| 7040102 | Kotz         | 2003 | Brain and Language                                                        | 2 | 10/8        |
| 7040108 | Smith        | 2002 | Neurology                                                                 | 1 | 10          |
| 7040111 | Jardri       | 2007 | NeuroImage                                                                | 2 | 12/1        |
| 7040113 | Ravnkilde    | 2002 | Journal of Clinical and Experimental Neuropsychology                      | 1 | 28          |
| 7050126 | Jobard       | 2007 | NeuroImage                                                                | 4 | 12/6/3/4    |
| 7050136 | Frankenstein | 2001 | NeuroImage                                                                | 1 | 8           |

|         |           |      |                                   |   |            |
|---------|-----------|------|-----------------------------------|---|------------|
| 7070170 | Dick      | 2007 | Journal of Cognitive Neuroscience | 2 | 19/10      |
| 7070188 | Seghier   | 2008 | Human Brain Mapping               | 1 | 10         |
| 7090267 | Meschyan  | 2006 | NeuroImage                        | 2 | 12/6       |
| 7090270 | Perani    | 1996 | Neuroreport                       | 5 | 10/6/6/4/5 |
| 7100287 | Eddington | 2007 | Journal of Cognitive Neuroscience | 3 | 5/6/3      |
| 7110328 | Liu       | 2007 | Human Brain Mapping               | 2 | 14/14      |
| 7110334 | Thompson  | 2007 | Journal of Cognitive Neuroscience | 3 | 25/28/31   |
| 7120385 | Ilg       | 2007 | NeuroImage                        | 3 | 21/8/3     |
| 8020061 | Shibata   | 2007 | Brain Research                    | 3 | 5/6/4      |
| 8060155 | Prince    | 2005 | Journal of Neuroscience           | 1 | 8          |
| 8080183 | Haller    | 2005 | Neuropsychologia                  | 1 | 7          |
| 9020038 | Grossman  | 2003 | Brain                             | 1 | 2          |

**Speech:**

| BMapID | 1st Auth. | Year | Journal     | Experiments | Foci                                      |
|--------|-----------|------|-------------|-------------|-------------------------------------------|
| 30422  | Adcock    | 2003 | NeuroImage  | 1           | 16                                        |
| 30081  | Fox       | 1996 | Nature      | 2           | 30/23                                     |
| 30130  | Fox       | 2001 | NeuroImage  | 1           | 5                                         |
| 30151  | Lotze     | 2000 | Neuroreport | 4           | 2/2/2/2                                   |
| 30166  | Rosen     | 2000 | Neurology   | 2           | 5/7                                       |
| 30188  | Xiong     | 2000 | NeuroImage  | 21          | 6/3/5/6/6/5/4/5/6/6/6/5/5/4/6/5/6/6/5/5/5 |

|         |            |      |                                                   |   |               |
|---------|------------|------|---------------------------------------------------|---|---------------|
| 30201   | Etard      | 2000 | Neuroreport                                       | 1 | 21            |
| 30216   | Tan        | 2001 | Neuroreport                                       | 2 | 37/51         |
| 30241   | Bookheimer | 1995 | Human Brain Mapping                               | 2 | 33/19         |
| 30242   | Braun      | 1997 | Brain                                             | 2 | 14/7          |
| 30246   | Paus       | 1993 | Journal of Neurophysiology                        | 4 | 3/4/6/7       |
| 30247   | Petersen   | 1988 | Nature                                            | 2 | 6/6           |
| 30255   | Fiez       | 1999 | Neuron                                            | 2 | 15/16         |
| 30257   | Hagoort    | 1999 | Journal of Cognitive Neuroscience                 | 2 | 17/13         |
| 30260   | Jernigan   | 1998 | NeuroImage                                        | 1 | 6             |
| 30265   | Rumsey     | 1997 | Brain                                             | 2 | 10/14         |
| 30271   | Bookheimer | 2000 | Neurology                                         | 3 | 10/10/14      |
| 30317   | Ingham     | 2000 | Brain and Language                                | 2 | 8/9           |
| 30344   | Chee       | 1999 | Journal of Neuroscience                           | 4 | 7/8/1/8       |
| 30378   | De Nil     | 2003 | Journal of Fluency Disorders                      | 2 | 8/8           |
| 30418   | Tatsumi    | 1999 | NeuroImage                                        | 5 | 8/6/6/5/5     |
| 4020012 | Price      | 1996 | Brain                                             | 5 | 12/15/10/19/9 |
| 4020013 | Price      | 1996 | NeuroImage                                        | 1 | 20            |
| 4090059 | De Nil     | 2000 | Journal of Speech, Language, and Hearing Research | 1 | 4             |
| 5040018 | Martin     | 1996 | Nature                                            | 1 | 7             |
| 5040019 | Murtha     | 1999 | Journal of Cognitive Neuroscience                 | 2 | 22/15         |
| 5070161 | Nakamura   | 2000 | Brain                                             | 1 | 5             |
| 5070166 | Petersen   | 1989 | Journal of Cognitive Neuroscience                 | 2 | 9/6           |
| 5110246 | Heim       | 2002 | Neuroscience Letters                              | 1 | 5             |

|         |            |      |                                                   |   |                      |
|---------|------------|------|---------------------------------------------------|---|----------------------|
| 6050068 | Brown      | 2006 | European Journal of Neuroscience                  | 1 | 55                   |
| 6050071 | Riecker    | 2000 | Neuroreport                                       | 1 | 6                    |
| 6050075 | Soros      | 2006 | NeuroImage                                        | 5 | 28/8/1/2/22          |
| 6060087 | Mechelli   | 2006 | NeuroImage                                        | 1 | 22                   |
| 6060095 | Wildgruber | 1996 | Neuroreport                                       | 1 | 2                    |
| 6070104 | Riecker    | 2002 | NeuroImage                                        | 2 | 13/15                |
| 6070105 | Riecker    | 2006 | NeuroImage                                        | 1 | 13                   |
| 6070106 | Riecker    | 2005 | Neurology                                         | 1 | 13                   |
| 6070107 | Wilson     | 2004 | Nature Neuroscience                               | 1 | 6                    |
| 7020036 | Tremblay   | 2006 | NeuroImage                                        | 3 | 4/7/7                |
| 7020056 | Kemeny     | 2005 | Human Brain Mapping                               | 4 | 6/12/11/11           |
| 7020069 | Basho      | 2007 | Neuropsychologia                                  | 2 | 6/2                  |
| 7060142 | Bohland    | 2006 | NeuroImage                                        | 7 | 41/55/39/49/55/18/54 |
| 7060155 | Riecker    | 2000 | Brain and Language                                | 4 | 2/3/2/1              |
| 7100292 | Kircher    | 2004 | NeuroImage                                        | 1 | 31                   |
| 8020050 | Kleber     | 2007 | NeuroImage                                        | 1 | 15                   |
| 8020068 | Brown      | 2008 | Cerebral Cortex                                   | 2 | 14/28                |
| 8080206 | Andreasen  | 1995 | American Journal of Psychiatry                    | 1 | 6                    |
| 8080234 | Rektorova  | 2007 | Movement Disorders                                | 1 | 35                   |
| 8110263 | Ghosh      | 2008 | Journal of Speech, Language, and Hearing Research | 2 | 61/37                |
| 9010019 | Tourville  | 2008 | NeuroImage                                        | 2 | 27/33                |
| 9010023 | Wilson     | 2009 | Brain                                             | 5 | 8/10/8/8/14          |

---



**Working Memory:**

| BMapID | 1st Auth. | Year | Journal                                         | Experiments | Foci     |
|--------|-----------|------|-------------------------------------------------|-------------|----------|
| 30011  | Cabeza    | 2002 | NeuroImage                                      | 1           | 33       |
| 30014  | Dade      | 2001 | NeuroImage                                      | 2           | 18/24    |
| 30021  | Garavan   | 2000 | Microscopy Research and Technique               | 1           | 17       |
| 30034  | Kapur     | 1996 | Journal of Cognitive Neuroscience               | 1           | 5        |
| 30042  | Lee       | 2002 | Human Brain Mapping                             | 1           | 26       |
| 30043  | Leveroni  | 2000 | Journal of Neuroscience                         | 3           | 3/3/2    |
| 30051  | Owen      | 1998 | Proceedings of the National Academy of Sciences | 2           | 12/10    |
| 30066  | Sperling  | 2001 | Human Brain Mapping                             | 3           | 15/5/17  |
| 30068  | Stern     | 2000 | NeuroImage                                      | 2           | 20/18    |
| 30097  | Pessoa    | 2002 | Neuron                                          | 1           | 19       |
| 30099  | Petit     | 1998 | Journal of Neuroscience                         | 2           | 4/4      |
| 30100  | Pochon    | 2001 | Cerebral Cortex                                 | 2           | 5/5      |
| 30116  | Bunge     | 2001 | Brain                                           | 1           | 14       |
| 30139  | Hasson    | 2002 | Neuron                                          | 1           | 3        |
| 30146  | Kelley    | 1998 | Neuron                                          | 3           | 14/22/19 |
| 30154  | Mellet    | 2000 | NeuroImage                                      | 3           | 11/17/15 |
| 30168  | Rypma     | 1999 | NeuroImage                                      | 2           | 16/41    |
| 30205  | Mazard    | 2002 | Journal of Cognitive Neuroscience               | 3           | 22/27/25 |
| 30214  | Zago      | 2002 | Neuroscience Letters                            | 1           | 6        |

|       |                |      |                                   |    |                                           |
|-------|----------------|------|-----------------------------------|----|-------------------------------------------|
| 30215 | Rowe           | 2000 | Science                           | 2  | 5/7                                       |
| 30243 | Clark          | 2000 | Human Brain Mapping               | 1  | 5                                         |
| 30274 | Crespo-Facorro | 2001 | Human Brain Mapping               | 1  | 8                                         |
| 30334 | Thierry        | 2003 | Human Brain Mapping               | 2  | 15/21                                     |
| 30371 | Braver         | 2001 | NeuroImage                        | 1  | 4                                         |
| 30372 | Braver         | 1997 | NeuroImage                        | 1  | 12                                        |
| 30374 | Callicott      | 1999 | Cerebral Cortex                   | 1  | 18                                        |
| 30375 | Carlson        | 1998 | Cerebral Cortex                   | 3  | 28/17/26                                  |
| 30381 | Druzgal        | 2001 | Cognitive Brain Research          | 1  | 12                                        |
| 30387 | Gruber         | 2003 | NeuroImage                        | 18 | 1/1/1/9/8/14/13/3/1/11/11/11/11/4/4/4/5/5 |
| 30408 | Phillips       | 1998 | Psychiatry Research               | 1  | 4                                         |
| 30420 | Veltman        | 2003 | NeuroImage                        | 6  | 8/11/17/4/11/10                           |
| 30425 | Casey          | 1998 | NeuroImage                        | 5  | 11/13/6/22/21                             |
| 30428 | Cohen          | 1994 | Human Brain Mapping               | 1  | 9                                         |
| 30429 | Cohen          | 1997 | Nature                            | 3  | 9/10/8                                    |
| 30436 | Desmond        | 2003 | NeuroImage                        | 1  | 16                                        |
| 30442 | Hautzel        | 2002 | Neuroscience Letters              | 1  | 16                                        |
| 30443 | Honey          | 2000 | NeuroImage                        | 1  | 10                                        |
| 30444 | Jonides        | 1997 | Journal of Cognitive Neuroscience | 3  | 24/22/3                                   |
| 30445 | Kim            | 2002 | NeuroImage                        | 3  | 7/9/6                                     |
| 30447 | Martinkauppi   | 2000 | Cerebral Cortex                   | 2  | 32/30                                     |
| 30449 | Owen           | 1999 | European Journal of Neuroscience  | 2  | 3/4                                       |
| 30457 | Smith          | 1996 | Cerebral Cortex                   | 5  | 9/4/6/9/14                                |

|         |               |      |                                                 |   |               |
|---------|---------------|------|-------------------------------------------------|---|---------------|
| 4020001 | Awh           | 1996 | Psychological Science                           | 3 | 9/12/9        |
| 4020003 | Becker        | 1994 | Human Brain Mapping                             | 2 | 15/13         |
| 4020005 | Fiez          | 1996 | Journal of Neuroscience                         | 2 | 16/24         |
| 4020007 | Grasby        | 1994 | Brain                                           | 2 | 16/15         |
| 4020009 | Kim           | 2003 | American Journal of Psychiatry                  | 1 | 8             |
| 4020014 | Ragland       | 2002 | Neuropsychology                                 | 6 | 6/5/7/9/10/6  |
| 4020015 | Schumacher    | 1996 | NeuroImage                                      | 2 | 12/13         |
| 4020017 | Zurowski      | 2002 | NeuroImage                                      | 1 | 8             |
| 4040029 | Honey         | 1999 | Proceedings of the National Academy of Sciences | 1 | 12            |
| 4040030 | Honey         | 2002 | Schizophrenia Research                          | 1 | 10            |
| 4040045 | Wykes         | 2002 | British Journal of Psychiatry                   | 1 | 5             |
| 5040047 | Chen          | 2004 | NeuroImage                                      | 2 | 17/27         |
| 5040052 | Landau        | 2004 | NeuroImage                                      | 7 | 3/3/5/1/8/6/7 |
| 5070080 | Honey         | 2003 | Psychological Medicine                          | 1 | 11            |
| 5070090 | LaBar         | 1999 | NeuroImage                                      | 1 | 8             |
| 5070108 | van Turennout | 2000 | Nature Neuroscience                             | 1 | 1             |
| 5070143 | Kawashima     | 1998 | Experimental Brain Research                     | 2 | 22/13         |
| 6050066 | Breitenstein  | 2005 | NeuroImage                                      | 2 | 14/9          |
| 6060082 | Drobyshevsky  | 2006 | NeuroImage                                      | 1 | 13            |
| 6080114 | Cairo         | 2004 | Cognitive Brain Research                        | 5 | 19/27/12/18/6 |
| 6080115 | Caldwell      | 2005 | Behavioral Neuroscience                         | 3 | 11/9/9        |
| 6080124 | Leung         | 2002 | Journal of Cognitive Neuroscience               | 2 | 15/18         |
| 6080126 | Mendrek       | 2004 | British Journal of Psychiatry                   | 2 | 6/8           |

|         |             |      |                                                           |   |             |
|---------|-------------|------|-----------------------------------------------------------|---|-------------|
| 6080127 | Menon       | 2001 | NeuroImage                                                | 1 | 10          |
| 6080128 | Perlstein   | 2003 | Biological Psychiatry                                     | 1 | 9           |
| 6080130 | Yoo         | 2005 | International Journal of Neuroscience                     | 1 | 22          |
| 6080132 | Johnson     | 2006 | Biological Psychiatry                                     | 2 | 9/13        |
| 6080134 | Linden      | 2003 | NeuroImage                                                | 2 | 2/15        |
| 6080135 | Monks       | 2004 | Bipolar Disorders                                         | 2 | 17/17       |
| 6080137 | Mu          | 2005 | Sleep                                                     | 3 | 6/7/5       |
| 6080141 | Rypma       | 2001 | Psychology and Aging                                      | 2 | 41/46       |
| 6080142 | Volle       | 2005 | Cerebral Cortex                                           | 5 | 2/7/11/17/2 |
| 7010007 | Harvey      | 2005 | NeuroImage                                                | 1 | 10          |
| 7010024 | Manoach     | 2000 | Biological Psychiatry                                     | 1 | 13          |
| 7010025 | Mendrek     | 2005 | Psychological Medicine                                    | 1 | 12          |
| 7020034 | Quintana    | 2003 | Biological Psychiatry                                     | 4 | 3/5/7/8     |
| 7020042 | Bedwell     | 2005 | International Journal of Neuroscience                     | 3 | 19/24/10    |
| 7020051 | Druzgal     | 2001 | Neuron                                                    | 1 | 17          |
| 7020060 | Meisenzahl  | 2006 | European Archives of Psychiatry and Clinical Neuroscience | 2 | 20723       |
| 7060148 | Lagopoulos  | 2007 | Journal of Psychiatry and Neuroscience                    | 3 | 7717/11     |
| 7070182 | Koshino     | 2008 | Cerebral Cortex                                           | 1 | 15          |
| 7070185 | Pfefferbaum | 2001 | NeuroImage                                                | 2 | 28/24       |
| 7080214 | van der Wee | 2003 | NeuroImage                                                | 1 | 6           |
| 7080227 | Savage      | 2001 | Brain                                                     | 3 | 2/2/2       |
| 7080235 | Matsuo      | 2007 | Molecular Psychiatry                                      | 3 | 4/2/7       |
| 7080240 | Walter      | 2007 | Journal of Affective Disorders                            | 3 | 6/11/10     |

|         |                 |      |                                                                    |   |        |
|---------|-----------------|------|--------------------------------------------------------------------|---|--------|
| 7100281 | Sheridan        | 2007 | Journal of the American Academy of Child and Adolescent Psychiatry | 3 | 8/12/2 |
| 7120368 | Mayer           | 2007 | NeuroImage                                                         | 1 | 33     |
| 7120378 | Kumari          | 2006 | Schizophrenia Research                                             | 1 | 22     |
| 8010016 | Postle          | 2007 | Cerebral Cortex                                                    | 2 | 10/30  |
| 8020070 | Neuner          | 2007 | Brain Research                                                     | 2 | 15/7   |
| 8030078 | Koppelstaetter  | 2008 | NeuroImage                                                         | 1 | 22     |
| 8100252 | Sanchez-Carrion | 2008 | Journal of Neurotrauma                                             | 2 | 16/18  |
| 8110297 | Ricciardi       | 2006 | Neuroscience                                                       | 2 | 46/44  |

**Memory:**

| BMapID | 1st Auth. | Year | Journal                                         | Experiments | Foci        |
|--------|-----------|------|-------------------------------------------------|-------------|-------------|
| 30001  | Anderson  | 2000 | Journal of Cognitive Neuroscience               | 4           | 21/23/18/19 |
| 30009  | Buckner   | 1998 | NeuroImage                                      | 1           | 53          |
| 30011  | Cabeza    | 2002 | NeuroImage                                      | 1           | 36          |
| 30018  | Duzel     | 2001 | Human Brain Mapping                             | 3           | 2/2/2       |
| 30019  | Duzel     | 1999 | Proceedings of the National Academy of Sciences | 3           | 2/2/2       |
| 30027  | Halsband  | 1998 | Behavioural Brain Research                      | 1           | 7           |
| 30030  | Herath    | 2001 | Human Brain Mapping                             | 1           | 1           |
| 30042  | Lee       | 2002 | Human Brain Mapping                             | 1           | 22          |
| 30043  | Leveroni  | 2000 | Journal of Neuroscience                         | 2           | 28/13       |
| 30050  | Nyberg    | 1996 | Journal of Neuroscience                         | 2           | 7/7         |

|         |                |      |                                                 |    |                         |
|---------|----------------|------|-------------------------------------------------|----|-------------------------|
| 30071   | Tsukiura       | 2002 | Human Brain Mapping                             | 2  | 10/9                    |
| 30135   | Grady          | 2001 | NeuroImage                                      | 2  | 18/19                   |
| 30150   | Lepage         | 2001 | NeuroImage                                      | 5  | 11/9/2/6/4              |
| 30157   | Nyberg         | 1996 | Proceedings of the National Academy of Sciences | 12 | 2/2/1/2/1/1/2/2/1/1/1/1 |
| 30179   | Squire         | 1992 | Proceedings of the National Academy of Sciences | 1  | 3                       |
| 30263   | Mencl          | 2000 | Microscopy Research and Technique               | 1  | 14                      |
| 30269   | Andreassen     | 2003 | Human Brain Mapping                             | 1  | 10                      |
| 30274   | Crespo-Facorro | 2001 | Human Brain Mapping                             | 1  | 4                       |
| 30277   | Eldridge       | 2000 | Nature Neuroscience                             | 2  | 15/3                    |
| 30299   | Sugiura        | 2001 | NeuroImage                                      | 2  | 19/8                    |
| 30316   | Herrmann       | 2001 | Human Brain Mapping                             | 1  | 5                       |
| 30330   | Paller         | 2003 | Learning & Memory                               | 1  | 8                       |
| 30357   | Miller         | 2002 | Journal of Cognitive Neuroscience               | 1  | 6                       |
| 30371   | Braver         | 2001 | NeuroImage                                      | 2  | 2/1                     |
| 30424   | Cansino        | 2002 | Cerebral Cortex                                 | 2  | 17/17                   |
| 30458   | Suzuki         | 2002 | NeuroImage                                      | 2  | 12/19                   |
| 30462   | Zysset         | 2001 | Neuroscience Letters                            | 1  | 6                       |
| 4020004 | Cabeza         | 2003 | Journal of Cognitive Neuroscience               | 2  | 9/7                     |
| 5070082 | Jackson        | 2004 | NeuroImage                                      | 1  | 61                      |
| 5070107 | van Turenout   | 2003 | Cerebral Cortex                                 | 4  | 3/2/2/2                 |
| 5070127 | Cabeza         | 2003 | Neuropsychologia                                | 1  | 17                      |
| 5070170 | Ragland        | 1998 | Neuropsychology                                 | 1  | 10                      |
| 6050045 | Daselaar       | 2001 | NeuroImage                                      | 1  | 9                       |

|         |                |      |                                   |   |             |
|---------|----------------|------|-----------------------------------|---|-------------|
| 6050055 | Ino            | 2004 | Brain Research Bulletin           | 4 | 15/14/18/12 |
| 6050059 | Mottaghy       | 1999 | Experimental Brain Research       | 2 | 11/10       |
| 6050063 | Sperling       | 2003 | NeuroImage                        | 2 | 13/5        |
| 6060077 | Bonner-Jackson | 2005 | Biological Psychiatry             | 3 | 10/46/50    |
| 6060079 | Buckner        | 1996 | Journal of Neuroscience           | 2 | 12/17       |
| 6060080 | Cabeza         | 1997 | Neuroreport                       | 2 | 4/10        |
| 6060083 | Fletcher       | 1996 | Brain                             | 2 | 6/1         |
| 6060097 | Halsband       | 2006 | Journal of Physiology - Paris     | 2 | 4/5         |
| 6080118 | Hofer          | 2003 | American Journal of Psychiatry    | 1 | 15          |
| 7040098 | Fliessbach     | 2006 | NeuroImage                        | 1 | 11          |
| 7050135 | Vandekerckhove | 2005 | Behavioural Neurology             | 1 | 18          |
| 7060144 | Dupont         | 2002 | Surgical and Radiologic Anatomy   | 2 | 17/20       |
| 7060156 | Ries           | 2006 | NeuroImage                        | 1 | 7           |
| 7100291 | Woodard        | 2007 | Journal of Cognitive Neuroscience | 2 | 12/11       |
| 7100296 | Maril          | 2003 | NeuroImage                        | 1 | 11          |
| 7110307 | Hofer          | 2007 | Brain and Cognition               | 3 | 13/6/11     |
| 7110325 | Kensinger      | 2007 | Neuropsychologia                  | 2 | 23/25       |
| 7110344 | Denkova        | 2006 | Neuropsychologia                  | 2 | 15/18       |
| 8020070 | Neuner         | 2007 | Brain Research                    | 2 | 15/13       |
| 8020072 | Pihlajamaki    | 2003 | Hippocampus                       | 2 | 15/10       |
| 8040092 | Assaf          | 2006 | Biological Psychiatry             | 1 | 15          |
| 8040096 | Ragland        | 2001 | American Journal of Psychiatry    | 1 | 8           |
| 8040098 | Weiss          | 2006 | Biological Psychiatry             | 1 | 5           |

|         |           |      |                                   |   |          |
|---------|-----------|------|-----------------------------------|---|----------|
| 8040100 | Fletcher  | 1998 | Archives of General Psychiatry    | 1 | 8        |
| 8040102 | Heckers   | 1998 | Nature Neuroscience               | 2 | 3/6      |
| 8050122 | Daselaar  | 2006 | Journal of Neurophysiology        | 2 | 11/9     |
| 8050123 | Dobbins   | 2003 | Neuropsychologia                  | 1 | 18       |
| 8050131 | Johnson   | 2007 | Cerebral Cortex                   | 2 | 3/1      |
| 8060145 | Henson    | 1999 | Journal of Neuroscience           | 1 | 12       |
| 8060151 | Murray    | 2007 | Journal of Neuroscience           | 1 | 21       |
| 8060154 | Peters    | 2007 | European Journal of Neuroscience  | 4 | 6/10/4/4 |
| 8080206 | Andreasen | 1995 | American Journal of Psychiatry    | 1 | 13       |
| 8080211 | Burianova | 2007 | Journal of Cognitive Neuroscience | 3 | 7/9/3    |
| 8110284 | Mainero   | 2004 | NeuroImage                        | 2 | 25       |
| 9020043 | Lanius    | 2004 | American Journal of Psychiatry    | 1 | 16       |
| 9020044 | Lanius    | 2007 | Psychiatry Research               | 1 | 6        |

---



## **Reference List**

Anderson ND (2000) The effects of divided attention on encoding- and retrieval-related brain activity: A PET study of younger and older adults. *Journal of Cognitive Neuroscience* 12:775-792

Arrington CM (2000) Neural mechanisms of visual attention: Object-based selection of a region in space. *Journal of Cognitive Neuroscience* 12:106-117

Bush G (1998) The counting Stroop: an interference task specialized for functional neuroimaging--validation study with functional MRI. *Human Brain Mapping* 6:270-282

Rosen AC (1999) Neural basis of endogenous and exogenous spatial orienting: A functional MRI study. *Journal of Cognitive Neuroscience* 11:135-152

Rushworth MF (2001) Attention systems and the organization of the human parietal cortex. *Journal of Neuroscience* 21:5262-5271

Sturm W (1999) Functional anatomy of intrinsic alertness: Evidence for a fronto-parietal-thalamic-brainstem network in the right hemisphere. *Neuropsychologia* 37:797-805

Simon O (2002) Topographical layout of hand, eye, calculation, and language-related areas in the human parietal lobe. *Neuron* 33:475-487

Corbetta M (1991) Selective and divided attention during visual discriminations of shape, color, and speed: functional anatomy by positron emission tomography. *Journal of Neuroscience* 11:2383-2402

Gitelman DR (2002) Functional anatomy of visual search: Regional segregations within the frontal eye fields and effective connectivity of the superior colliculus. *NeuroImage* 15:970-982

Johansen-Berg H (2000) Attention to touch modulates activity in both primary and secondary somatosensory areas. *Neuroreport* 11:1237-1241

Steel C (2001) Neuroimaging correlates of negative priming. *Neuroreport* 12:3619-3624

Carter CS (1995) Interference and facilitation effects during selective attention: an H<sub>2</sub>O<sup>15</sup> PET study of Stroop task performance. *NeuroImage* 2:264-272

Derbyshire SWG (1998) Pain and Stroop interference tasks activate separate processing modules in anterior cingulate cortex. *Experimental Brain Research* 118:52-60

MacDonald III (2000) Dissociating the role of the dorsolateral prefrontal and anterior cingulate cortex in cognitive control. *Science* 288:1835-1838

Pardo J, V (1990) The anterior cingulate cortex mediates processing selection in the Stroop attentional conflict paradigm. *Proceedings of the National Academy of Sciences* 87:256-259

Ruff CC (2001) The role of the anterior cingulate cortex in conflict processing: evidence from reverse Stroop interference. *NeuroImage* 14:1150-1158

Whalen PJ (1998) The emotional counting Stroop paradigm: A functional magnetic resonance imaging probe of the anterior cingulate affective division. *Biological Psychiatry* 44:1219-1228

de ZG, I (2001) The semantic interference effect in the picture-word paradigm: An event-related fMRI study employing overt responses. *Human Brain Mapping* 14:218-227

Banich MT (2000) FMRI studies of Stroop tasks reveal unique roles of anterior and posterior brain systems in attentional selection. *Journal of Cognitive Neuroscience* 12:988-1000

Peterson BS (2002) An event-related functional MRI study comparing interference effects in the Simon and Stroop tasks. *Cognitive Brain Research* 13:427-440

Bench CJ (1993) Investigations of the functional anatomy of attention using the Stroop test. *Neuropsychologia* 31:907-922

George MS (1994) Regional brain activity when selecting a response despite interference: an H215O PET study of the Stroop and an emotional Stroop. *Human Brain Mapping* 1:194-209

Marois R (2000) Neural correlates of the attentional blink. *Neuron* 28:299-308

Shaywitz BA (2001) The functional neural architecture of components of attention in language-processing tasks. *NeuroImage* 13:601-612

Stevens AA (2000) Event-related fMRI of auditory and visual oddball tasks. *Magnetic Resonance Imaging* 18:495-502

- O'Leary DS (2002) Effects of smoking marijuana on brain perfusion and cognition. *Neuropsychopharmacology* 26:802-816
- Marois R (2000) A stimulus-driven approach to object identity and location processing in the human brain. *Neuron* 25:717-728
- Brown GG (1999) Brain activation and pupil response during covert performance of the Stroop Color Word task. *Journal of the International Neuropsychological Society* 5:308-319
- Fan J (2003) Cognitive and brain consequences of conflict. *NeuroImage* 18:42-57
- Leung HC (2000) An event-related functional MRI study of the Stroop color word interference task. *Cerebral Cortex* 10:552-560
- Mead LA (2002) Neural basis of the Stroop interference task: response competition or selective attention? *Journal of the International Neuropsychological Society* 8:735-742
- Taylor SF (1997) Isolation of specific interference processing in the Stroop task: PET activation studies. *NeuroImage* 6:81-92
- Brass M (2001) The inhibition of imitative response tendencies. *NeuroImage* 14:1416-1423
- Peterson BS (1999) An fMRI study of Stroop word-color interference: evidence for cingulate subregions subserving multiple distributed attentional systems. *Biological Psychiatry* 45:1237-1258
- Milham MP (2002) Attentional control in the aging brain: Insights from an fMRI study of the Stroop task. *Brain and Cognition* 49:277-296
- Jonides J (1997) Verbal working memory load affects regional brain activation as measured by PET. *Journal of Cognitive Neuroscience* 9:462-475
- Milham MP (2001) The relative involvement of anterior cingulate and prefrontal cortex in attentional control depends on nature of conflict. *Cognitive Brain Research* 12:467-473
- Konishi S H (2002) Hemispheric asymmetry in human lateral prefrontal cortex during cognitive set shifting. *Proceedings of the National Academy of Sciences* 99:7803-7808
- Corbetta M (2000) Voluntary orienting is dissociated from target detection in human posterior parietal cortex. *Nature Neuroscience* 3:292-297

- Corbetta M (1998) A common network of functional areas for attention and eye movements. *Neuron* 21:761-773
- Gitelman DR (1999) A large-scale distributed network for covert spatial attention: Further anatomical delineation based on stringent behavioural and cognitive controls. *Brain* 122:1093-1106
- Hopfinger JB (2000) The neural mechanisms of top-down attentional control. *Nature Neuroscience* 3:284-291
- LaBar KS (1999) Neuroanatomic overlap of working memory and spatial attention networks: A functional MRI comparison within subjects. *NeuroImage* 10:695-704
- Milham MP (2005) Anterior cingulate cortex: An fMRI analysis of conflict specificity and functional differentiation. *Human Brain Mapping* 25:328-335
- Thiel CM (2004) Cerebral correlates of alerting, orienting and reorienting of visuospatial attention: An event-related fMRI study. *NeuroImage* 21:318-328
- Winterer G (2002) Volition to action-An event-related fMRI study. *NeuroImage* 17:851-858
- Astafiev S, V (2003) Functional organization of human intraparietal and frontal cortex for attending, looking, and pointing. *Journal of Neuroscience* 23:4689-4699
- Beauchamp MS (2001) A parametric fMRI study of overt and covert shifts of visuospatial attention. *NeuroImage* 14:310-321
- Berman KF (1995) Physiological activation of a cortical network during performance of the Wisconsin Card Sorting Test: A positron emission tomography study. *Neuropsychologia* 33:1027-1046
- Goldberg TE (1998) Uncoupling cognitive workload and prefrontal cortical physiology: A PET rCBF study. *NeuroImage* 7:296-303
- Nagahama Y (1996) Cerebral activation during performance of a card sorting test. *Brain* 119:1667-1675
- Nagahama Y (2001) Dissociable mechanisms of attentional control within the human prefrontal cortex. *Cerebral Cortex* 11:85-92
- Nagahama Y (1997) Age-related changes in cerebral blood flow activation during a Card Sorting Test. *Experimental Brain Research* 114:571-577

- Peelen M, V (2004) Endogenous and exogenous attention shifts are mediated by the same large-scale neural network. *NeuroImage* 22:822-830
- Ragland JD (1998) Frontotemporal cerebral blood flow change during executive and declarative memory tasks in schizophrenia: A positron emission tomography study. *Neuropsychology* 12:399-413
- Banich MT (2000) Prefrontal regions play a dominant role in imposing an attentional 'set': Evidence from fMRI. *Cognitive Brain Research* 10:1-9
- Cools R (2004) Differential responses in human striatum and prefrontal cortex to changes in object and rule relevance. *Journal of Neuroscience* 24:1129-1135
- DiGirolamo GJ (2001) General and task-specific frontal lobe recruitment in older adults during executive processes: A fMRI investigation of task-switching. *Neuroreport* 12:2065-2071
- Dove A (2000) Prefrontal cortex activation in task switching: An event-related fMRI study. *Cognitive Brain Research* 9:103-109
- Kimberg DY (2000) Modulation of task-related neural activity in task-switching: An fMRI study. *Cognitive Brain Research* 10:189-196
- Kringelbach ML (2003) Neural correlates of rapid reversal learning in a simple model of human social interaction. *NeuroImage* 20:1371-1383
- Milham MP (2003) Competition for priority in processing increases prefrontal cortex's involvement in top-down control: An event-related fMRI study of the stroop task. *Cognitive Brain Research* 17:212-222
- Nakahara K (2002) Functional MRI of macaque monkeys performing a cognitive set-shifting task. *Science* 295:1532-1536
- Omori M (1999) Neuronal substrates participating in attentional set-shifting of rules for visually guided motor selection: A functional magnetic resonance imaging investigation. *Neuroscience Research* 33:317-323
- Pollmann S D (2000) Event-related fMRI: Comparison of conditions with varying BOLD overlap. *Human Brain Mapping* 9:26-37
- Potenza MN (2003) An fMRI Stroop task study of ventromedial prefrontal cortical function in pathological gamblers. *American Journal of Psychiatry* 160:1990-1994

Smith AB (2004) Neural correlates of switching set as measured in fast, event-related functional magnetic resonance imaging. *Human Brain Mapping* 21:247-256

Swainson R (2003) Cognitive control mechanisms revealed by ERP and fMRI: Evidence from repeated task-switching. *Journal of Cognitive Neuroscience* 15:785-799

Banich MT (2001) Attentional selection and the processing of task-irrelevant information: Insights from fMRI examinations of the Stroop task. *Progress in Brain Research* 134:459-470

Brass M (2002) The role of the frontal cortex in task preparation. *Cerebral Cortex* 12:908-914

Brass M (2004) Decomposing components of task preparation with functional magnetic resonance imaging. *Journal of Cognitive Neuroscience* 16:609-620

Braver TS (2003) Neural mechanisms of transient and sustained cognitive control during task switching. *Neuron* 39:713-726

Dreher JC (2003) Dissociating the roles of the rostral anterior cingulate and the lateral prefrontal cortices in performing two tasks simultaneously or successively. *Cerebral Cortex* 13:329-339

Dreher JC (2002) The roles of timing and task order during task switching. *NeuroImage* 17:95-109

Luks TL (2002) Evidence for anterior cingulate cortex involvement in monitoring preparatory attentional set. *NeuroImage* 17:792-802

Rushworth MF (2002) Role of the human medial frontal cortex in task switching: A combined fMRI and TMS study. *Journal of Neurophysiology* 87:2577-2592

Sylvester CC (2003) Switching attention and resolving interference: fMRI measures of executive functions. *Neuropsychologia* 41:357-370

Zysset S M (2001) Color-word matching stroop task: Separating interference and response conflict. *NeuroImage* 13:29-36

Kerns JG (2005) Decreased conflict- and error-related activity in the anterior cingulate cortex in subjects with schizophrenia. *American Journal of Psychiatry* 162:1833-1839

Heckers S W (2004) Anterior cingulate cortex activation during cognitive interference in schizophrenia. *American Journal of Psychiatry* 161:707-715

Jeong BS (2005) Functional imaging evidence of the relationship between recurrent psychotic episodes and neurodegenerative course in schizophrenia. *Psychiatry Research* 139:219-228

Weiss EM (2003) Brain activation patterns during a selective attention test - A functional MRI study in healthy volunteers and patients with schizophrenia. *Psychiatry Research* 123:1-15

Mendrek A (2004) Changes in distributed neural circuitry function in patients with first-episode schizophrenia. *British Journal of Psychiatry* 185:205-214

Eyler LT (2004) Abnormal brain response of chronic schizophrenia patients despite normal performance during a visual vigilance task. *Psychiatry Research* 130:245-257

Bedwell JS (2005) Functional neuroanatomy of subcomponent cognitive processes involved in verbal working memory. *International Journal of Neuroscience* 115:1017-1032

Fink GR (1997) Neural mechanisms involved in the processing of global and local aspects of hierarchically organized visual stimuli. *Brain* 120:1779-1791

Gurd JM (2002) Posterior parietal cortex is implicated in continuous switching between verbal fluency tasks: An fMRI study with clinical implications. *Brain* 125:1024-1038

Weiss EM (2007) Brain activation patterns during a selective attention test - a functional MRI study in healthy volunteers and unmedicated patients during an acute episode of schizophrenia. *Psychiatry Research* 154:31-40

Barch DM (2001) Anterior cingulate cortex and response conflict: Effects of response modality and processing domain. *Cerebral Cortex* 11:837-848

Dichter GS (2007) Social stimuli interfere with cognitive control in autism. *NeuroImage* 35:1219-1230

Ravnikilde B (2002) Putative tests of frontal lobe function: A PET-study of brain activation during Stroop's test and verbal fluency. *Journal of Clinical and Experimental Neuropsychology* 24:534-547

Frankenstein UN (2001) Distraction modulates anterior cingulate gyrus activations during the cold pressor test. *NeuroImage* 14:827-836

Tang J (2006) Imaging informational conflict: A functional magnetic resonance imaging study of numerical stroop. *Journal of Cognitive Neuroscience* 18:2049-2062

- Wrase J (2007) Dysfunction of reward processing correlates with alcohol craving in detoxified alcoholics. *NeuroImage* 35:787-794
- Durston S D (2003) Parametric manipulation of conflict and response competition using rapid mixed-trial event-related fMRI. *NeuroImage* 20:2135-2141
- Fiehler K (2004) Neural correlates of error detection and error correction: Is there a common neuroanatomical substrate? *European Journal of Neuroscience* 19:3081-3087
- Gur RC (2007) Hemodynamic response in neural circuitries for detection of visual target and novelty: An event-related fMRI study. *Human Brain Mapping* 28:263-274
- Hazeltine E B (2003) Material-dependent and material-independent selection processes in the frontal and parietal lobes: An event-related fMRI investigation of response competition. *Neuropsychologia* 41:1208-1217
- Pfefferbaum A (2001) Reorganization of frontal systems used by alcoholics for spatial working memory: An fMRI study. *NeuroImage* 14:7-20
- Fitzgerald KD (2005) Error-related hyperactivity of the anterior cingulate cortex in obsessive-compulsive disorder. *Biological Psychiatry* 57:287-294
- Nakao T (2005) A functional MRI comparison of patients with obsessive-compulsive disorder and normal controls during a Chinese character Stroop task. *Psychiatry Research* 139:101-114
- Wagner G (2006) Cortical inefficiency in patients with unipolar depression: An event-related fMRI study with the Stroop task. *Biological Psychiatry* 59:958-965
- Yucel M (2007) Functional and biochemical alterations of the medial frontal cortex in obsessive-compulsive disorder. *Archives of General Psychiatry* 64:946-955
- Maltby N (2005) Dysfunctional action monitoring hyperactivates frontal-striatal circuits in obsessive-compulsive disorder: An event-related fMRI study. *NeuroImage* 24:495-503
- Ullsperger M (2001) Subprocesses of performance monitoring: A dissociation of error processing and response competition revealed by event-related fMRI and ERPs. *NeuroImage* 14:1387-1401
- Phelps EA (2004) Extinction learning in humans: Role of the amygdala and vmPFC. *Neuron* 43:897-905



- Vuilleumier P (2001) Effects of attention and emotion on face processing in the human brain: An event-related fMRI study. *Neuron* 30:829-841
- Buchel C (1999) Amygdala-hippocampal involvement in human aversive trace conditioning revealed through event-related functional magnetic resonance imaging. *Journal of Neuroscience* 19:10869-10876
- Georgiou-Karistianis N (2007) Increased cortical recruitment in Huntington's disease using a Simon task. *Neuropsychologia* 45:1791-1800
- Kerns JG (2006) Anterior cingulate and prefrontal cortex activity in an fMRI study of trial-to-trial adjustments on the Simon task. *NeuroImage* 33:399-405
- Liu X (2004) Common and distinct neural substrates of attentional control in an integrated Simon and spatial Stroop task as assessed by event-related fMRI. *NeuroImage* 22:1097-1106
- Maclin EL (2001) Visual spatial localization conflict: An fMRI study. *Neuroreport* 12:3633-3636
- Rubia K (2006) Progressive increase of frontostriatal brain activation from childhood to adulthood during event-related tasks of cognitive control. *Human Brain Mapping* 27:973-993
- Wittfoth M (2006) Comparison of two Simon tasks: Neuronal correlates of conflict resolution based on coherent motion perception. *NeuroImage* 32:921-929
- Rogers RD (2000) Contrasting cortical and subcortical activations produced by attentional-set shifting and reversal learning in humans. *Journal of Cognitive Neuroscience* 12:142-162
- Simon O (2004) Automated clustering and functional geometry of human parietofrontal networks for language, space, and number. *NeuroImage* 23:1192-1202
- Bayless SJ (2006) Spatiotemporal analysis of feedback processing during a card sorting task using spatially filtered MEG. *Neuroscience Letters* 410:31-36
- Stern ER (2007) Preparatory neural activity predicts performance on a conflict task. *Brain Research* 1176:92-102
- Carlsson K (2000) Tickling expectations: Neural processing in anticipation of a sensory stimulus. *Journal of Cognitive Neuroscience* 12:691-703
- Elliott R (1997) Differential neural response to positive and negative feedback in planning and guessing tasks. *Neuropsychologia* 35:1395-1404

- Bermpohl F (2006) Attentional modulation of emotional stimulus processing: An fMRI study using emotional expectancy. *Human Brain Mapping* 27:662-677
- Forstmann BU (2008) Neural mechanisms, temporal dynamics, and individual differences in interference control. *Journal of Cognitive Neuroscience* 20:1854-1865
- Sommer M (2008) Emotion-dependent modulation of interference processes: An fMRI study. *Acta Neurobiologiae Experimentalis* 68:193-203
- Wittfoth M (2008) The influence of response conflict on error processing: Evidence from event-related fMRI. *Brain Research* 1194:118-129
- Coull JT (2004) Functional anatomy of the attentional modulation of time estimation. *Science* 303:1506-1508
- Hamann SB (1999) Amygdala activity related to enhanced memory for pleasant and aversive stimuli. *Nature Neuroscience* 2:289-293
- Maddock RJ (2003) Posterior cingulate cortex activation by emotional words: fMRI evidence from a valence decision task. *Human Brain Mapping* 18:30-41
- Canli T (1998) Hemispheric asymmetry for emotional stimuli detected with fMRI. *Neuroreport* 9:3233-3239
- Elliott R (2000) Dissociable neural responses in human reward systems. *Journal of Neuroscience* 20:6159-6165
- Bystritsky A (2001) Functional MRI changes during panic anticipation and imagery exposure. *Neuroreport* 12:3953-3957
- Paradiso S J (1999) Cerebral blood flow changes associated with attribution of emotional valence to pleasant, unpleasant, and neutral visual stimuli in a PET study of normal subjects. *American Journal of Psychiatry* 156:1618-1629
- Gandour J (2003) A cross-linguistic fMRI study of perception of intonation and emotion in Chinese. *Human Brain Mapping* 18:149-157
- Baker SC (1997) The interaction between mood and cognitive function studied with PET. *Psychological Medicine* 27:565-578
- Beauregard M (1998) The functional neuroanatomy of major depression: an fMRI study using an emotional activation paradigm. *Neuroreport* 9:3253-3258

Damasio AR (2000) Subcortical and cortical brain activity during the feeling of self-generated emotions. *Nature Neuroscience* 3:1049-1056

Dolan RJ (2000) Dissociable temporal lobe activations during emotional episodic memory retrieval. *NeuroImage* 11:203-209

Dougherty DD (1999) Anger in healthy men: a PET study using script-driven imagery. *Biological Psychiatry* 46:466-472

Gemar MC (1996) Effects of self-generated sad mood on regional cerebral activity: a PET study in normal subjects. *Depression* 4:81-88

George MS (1995) Brain activity during transient sadness and happiness in healthy women. *American Journal of Psychiatry* 152:341-351

George MS (1996) Gender differences in regional cerebral blood flow during transient self-induced sadness or happiness. *Biological Psychiatry* 40:859-871

Kosslyn SM (1996) Neural effects of visualizing and perceiving aversive stimuli: a PET investigation. *Neuroreport* 7:1569-1576

Lane RD (1997) Neuroanatomical correlates of happiness, sadness, and disgust. *American Journal of Psychiatry* 154:926-933

Lane RD (1997) Neuroanatomical correlates of pleasant and unpleasant emotion. *Neuropsychologia* 35:1437-1444

Lane RD (1999) Common effects of emotional valence, arousal and attention on neural activation during visual processing of pictures. *Neuropsychologia* 37:989-997

Lane RD (1997) Neural activation during selective attention to subjective emotional responses. *Neuroreport* 8:3969-3972

Liberzon I (2000) Limbic activation and psychophysiologic responses to aversive visual stimuli: Interaction with cognitive task. *Neuropsychopharmacology* 23:508-516

Liotti M (2000) Differential limbic-cortical correlates of sadness and anxiety in healthy subjects: Implications for affective disorders. *Biological Psychiatry* 48:30-42

Mayberg HS (1999) Reciprocal limbic-cortical function and negative mood: Converging PET findings in depression and normal sadness. *American Journal of Psychiatry* 156:675-682

Pietrini P (2000) Neural correlates of imaginal aggressive behavior assessed by positron emission tomography in healthy subjects. *American Journal of Psychiatry* 157:1772-1781

Reiman EM (1997) Neuroanatomical correlates of externally and internally generated human emotion. *American Journal of Psychiatry* 154:918-925

Teasdale JD (1999) Functional MRI study of the cognitive generation of affect. *American Journal of Psychiatry* 156:209-215

Royet JP (2000) Emotional responses to pleasant and unpleasant olfactory, visual, and auditory stimuli: A positron emission tomography study. *Journal of Neuroscience* 20:7752-7759

Simpson JR (2000) The emotional modulation of cognitive processing: an fMRI study. *Journal of Cognitive Neuroscience* 12:157-170

Taylor SF (1998) The effect of emotional content on visual recognition memory: A PET activation study. *NeuroImage* 8:188-197

Taylor SF (2000) The effect of graded aversive stimuli on limbic and visual activation. *Neuropsychologia* 38:1415-1425

Lee GP (2004) Neural substrates of emotion as revealed by functional magnetic resonance imaging. *Cognitive Behavioral Neurology* 17:9-17

Mitterschiffthaler MT (2003) Neural response to pleasant stimuli in anhedonia: An fMRI study. *Neuroreport* 14:177-182

Goldin PR (2005) The neural bases of amusement and sadness: A comparison of block contrast and subject-specific emotion intensity regression approaches. *NeuroImage* 1:26-36

Markowitsch HJ (2003) Engagement of lateral and medial prefrontal areas in the ephory of sad and happy autobiographical memories. *Cortex* 39:643-665

Pelletier M (2003) Separate neural circuits for primary emotions? Brain activity during self-induced sadness and happiness in professional actors. *Neuroreport* 14:1111-1116

Britton JC (2006) Neural correlates of social and nonsocial emotions: An fMRI study. *NeuroImage* 31:397-409

Drobyshevsky A (2006) A rapid fMRI task battery for mapping of visual, motor, cognitive, and emotional function. *NeuroImage* 31:732-744

- Keedwell PA (2005) A double dissociation of ventromedial prefrontal cortical responses to sad and happy stimuli in depressed and healthy individuals. *Biological Psychiatry* 58:495-503
- Anand A (2005) Activity and connectivity of brain mood regulating circuit in depression: A functional magnetic resonance study. *Biological Psychiatry* 57:1079-1088
- Cato MA (2004) Processing words with emotional connotation: An fMRI study of time course and laterality in rostral frontal and retrosplenial cortices. *Journal of Cognitive Neuroscience* 16:167-177
- Frey S K (2000) Orbitofrontal involvement in the processing of unpleasant auditory information. *European Journal of Neuroscience* 12:3709-3712
- Bartolo A (2006) Humor comprehension and appreciation: An fMRI study. *Journal of Cognitive Neuroscience* 18:1789-1798
- Buchanan TW (2000) Recognition of emotional prosody and verbal components of spoken language: An fMRI study. *Cognitive Brain Research* 9:227-238
- Ethofer T (2006) Effects of prosodic emotional intensity on activation of associative auditory cortex. *Neuroreport* 17:249-253
- Grandjean D (2005) The voices of wrath: Brain responses to angry prosody in meaningless speech. *Nature Neuroscience* 8:145-146
- Kotz SA (2003) On the lateralization of emotional prosody: An event-related functional MR investigation. *Brain and Language* 86:366-376
- Mitchell RLC (2003) The neural response to emotional prosody, as revealed by functional magnetic resonance imaging. *Neuropsychologia* 41:1410-1421
- Ogino Y (2007) Inner experience of pain: Imagination of pain while viewing images showing painful events forms subjective pain representation in human brain. *Cerebral Cortex* 17:1139-1146
- Zald DH (2002) Brain activity in ventromedial prefrontal cortex correlates with individual differences in negative affect. *Proceedings of the National Academy of Sciences* 99:2450-2454
- Shapira NA (2003) Brain activation by disgust-inducing pictures in obsessive-compulsive disorder. *Biological Psychiatry* 54:751-756

Knutson B (2001) Anticipation of increasing monetary reward selectively recruits nucleus accumbens. *Journal of Neuroscience* 21:1-5

Phan KL (2005) Neural substrates for voluntary suppression of negative affect: A functional magnetic resonance imaging study. *Biological Psychiatry* 57:210-219

Taylor SF (2003) Subjective rating of emotionally salient stimuli modulates neural activity. *NeuroImage* 18:650-659

Stark R (2007) Hemodynamic brain correlates of disgust and fear ratings. *NeuroImage* 37:663-673

Herwig U (2007) Expecting unpleasant stimuli - An fMRI study. *Psychiatry Research* 154:1-12

Nitschke JB (2004) Orbitofrontal cortex tracks positive mood in mothers viewing pictures of their newborn infants. *NeuroImage* 21:583-592

Schienze A (2005) Brain activation of spider phobics towards disorder-relevant, generally disgust- and fear-inducing pictures. *Neuroscience Letters* 388:1-6

Straube T (2007) Waiting for spiders: Brain activation during anticipatory anxiety in spider phobics. *NeuroImage* 37:1427-1436

Noriuchi M (2008) The functional neuroanatomy of maternal love: Mother's response to infant's attachment behaviors. *Biological Psychiatry* 63:415-423

Coan JA (2006) Lending a hand: Social regulation of the neural response to threat. *Psychological Science* 17:1032-1039

Iaria G (2008) Neural activity of the anterior insula in emotional processing depends on the individuals' emotional susceptibility. *Human Brain Mapping* 29:363-373

Bartels A (2004) The neural correlates of maternal and romantic love. *NeuroImage* 21:1155-1166

Bartels A (2000) The neural basis of romantic love. *Neuroreport* 11:3829-3834

Eippert F (2007) Regulation of emotional responses elicited by threat-related stimuli. *Human Brain Mapping* 28:409-423

Fitzgerald DA (2004) Neural correlates of internally-generated disgust via autobiographical recall: A functional magnetic resonance imaging investigation. *Neuroscience Letters* 370:91-96

Goldin PR (2008) The neural bases of emotion regulation: Reappraisal and suppression of negative emotion. *Biological Psychiatry* 63:577-586

Reiss AL (2008) Anomalous hypothalamic responses to humor in cataplexy. *PLoS ONE* 3:2225

Dolcos F (2004) Dissociable effects of arousal and valence on prefrontal activity indexing emotional evaluation and subsequent memory: An event-related fMRI study. *NeuroImage* 23:64-74

Garrett AS (2006) Separating subjective emotion from the perception of emotion-inducing stimuli: An fMRI study. *NeuroImage* 33:263-274

Mathews A (2004) Individual differences in the modulation of fear-related brain activation by attentional control. *Journal of Cognitive Neuroscience* 16:1683-1694

Wrase J (2003) Gender differences in the processing of standardized emotional visual stimuli in humans: A functional magnetic resonance imaging study. *Neuroscience Letters* 348:41-45

Bermpohl F (2006) Attentional modulation of emotional stimulus processing: An fMRI study using emotional expectancy. *Human Brain Mapping* 27:662-677

Junghofer M (2006) Fleeting images: Rapid affect discrimination in the visual cortex. *Neuroreport* 17:225-229

Najib A (2004) Regional brain activity in women grieving a romantic relationship breakup. *American Journal of Psychiatry* 161:2245-2256

Ranote S E (2004) The neural basis of maternal responsiveness to infants: An fMRI study. *Neuroreport* 15:1825-1829

Stark R (2005) Erotic and disgust-inducing pictures--Differences in the hemodynamic responses of the brain. *Biological Psychology* 70:19-29

Butler T (2007) Human fear-related motor neurocircuitry. *Neuroscience* 150:1-7

Malhi GS (2004) Cognitive generation of affect in bipolar depression: An fMRI study. *European Journal of Neuroscience* 19:741-754

Sanjuan J (2007) Emotional words induce enhanced brain activity in schizophrenic patients with auditory hallucinations. *Psychiatry Research* 154:21-29

Wicker B (2003) Both of us disgusted in my insula: the common neural basis of seeing and feeling disgust. *Neuron* 40:655-664

Sabatinelli D (2007) Pleasure rather than salience activates human nucleus accumbens and medial prefrontal cortex. *Journal of Neurophysiology* 98:1374-1379

Herpertz SC (2008) Emotional processing in male adolescents with childhood-onset conduct disorder. *Journal of Child Psychology and Psychiatry* 49:781-791

Hariri AR (2000) Modulating emotional responses: effects of a neocortical network on the limbic system. *Neuroreport* 11:43-46

Abel KM (2003) Ketamine alters neural processing of facial emotion recognition in healthy men: an fMRI study. *Neuroreport* 14:387-391

Gorno-Tempini ML (2001) Explicit and incidental facial expression processing: an fMRI study. *NeuroImage* 14:465-473

Kesler-West ML (2001) Neural substrates of facial emotion processing using fMRI. *Cognitive Brain Research* 11:213-226

Wright C, I (2002) Enhanced amygdala responses to emotional versus neutral schematic facial expressions. *Neuroreport* 13:785-790

Blair RJ (1999) Dissociable neural responses to facial expressions of sadness and anger. *Brain* 122:883-893

Breiter HC (1996) Response and habituation of the human amygdala during visual processing of facial expression. *Neuron* 17:875-887

Kimbrell TA (1999) Regional brain activity during transient self-induced anxiety and anger in healthy adults. *Biological Psychiatry* 46:454-465

Morris JS (1998) A neuromodulatory role for the human amygdala in processing emotional facial expressions. *Brain* 121:47-57



- Morris JS (1999) Saying it with feeling: neural responses to emotional vocalizations. *Neuropsychologia* 37:1155-1163
- Morris JS (1996) A differential neural response in the human amygdala to fearful and happy facial expressions. *Nature* 383:812-815
- Nakamura K (1999) Activation of the right inferior frontal cortex during assessment of facial emotion. *Journal of Neurophysiology* 82:1610-1614
- Phillips ML (1997) A specific neural substrate for perceiving facial expressions of disgust. *Nature* 389:495-498
- Phillips ML (1998) Neural responses to facial and vocal expressions of fear and disgust. *Proceedings of the Royal Society of London. Series B. Biological Sciences* 265:1809-1817
- Phillips ML (1998) Investigation of facial recognition memory and happy and sad facial expression perception: An fMRI study. *Psychiatry Research* 83:127-138
- Sprengelmeyer R (1998) Neural structures associated with recognition of facial expressions of basic emotion. *Proceedings of the Royal Society of London. Series B. Biological Sciences* 265:1927-1931
- Whalen PJ (1998) Masked presentations of emotional facial expressions modulate amygdala activity without explicit knowledge. *Journal of Neuroscience* 18:411-418
- George MS (1993) Brain regions involved in recognizing facial emotion or identity: An oxygen-15 PET study. *Journal of Neuropsychiatry and Clinical Neuroscience* 5:384-394
- Hall GBC (2004) Sex differences in functional activation patterns revealed by increased emotion processing demands. *Neuroreport* 15:219-223
- Habel U (2005) Same or different? Neural correlates of happy and sad mood in healthy males. *NeuroImage* 15:206-214
- Winston JS (2003) Common and distinct neural responses during direct and incidental processing of multiple facial emotions. *NeuroImage* 20:84-97
- Critchley HD (2000) Explicit and implicit neural mechanisms for processing of social information from facial expressions: A functional magnetic resonance imaging study. *Human Brain Mapping* 9:93-105
- Dolan RJ (1996) Neural activation during covert processing of positive emotional facial expressions. *NeuroImage* 4:194-200

- Wang AT (2004) Neural correlates of facial affect processing in children and adolescents with autism spectrum disorder. *Journal of the American Academy of Child and Adolescent Psychiatry* 43:481-490
- Habel U (2007) Amygdala activation and facial expressions: Explicit emotion discrimination versus implicit emotion processing. *Neuropsychologia* 45:2369-2377
- Malhi GS (2007) Is a lack of disgust something to fear? A functional magnetic resonance imaging facial emotion recognition study in euthymic bipolar disorder patients. *Bipolar Disorders* 9:345-357
- Williams LM (2001) Arousal dissociates amygdala and hippocampal fear responses: evidence from simultaneous fMRI and skin conductance recording. *NeuroImage* 14:1070-1079
- Vuilleumier P (2001) Effects of attention and emotion on face processing in the human brain: An event-related fMRI study. *Neuron* 30:829-841
- Deeley Q (2007) An event related functional magnetic resonance imaging study of facial emotion processing in Asperger syndrome. *Biological Psychiatry* 62:207-217
- Deeley Q (2006) Facial emotion processing in criminal psychopathy: Preliminary functional magnetic resonance imaging study. *British Journal of Psychiatry* 189:533-539
- Britton JC (2006) Facial expressions and complex IAPS pictures: Common and differential networks. *NeuroImage* 31:906-919
- Lennox BR (2004) Behavioural and neurocognitive responses to sad facial affect are attenuated in patients with mania. *Psychological Medicine* 34:795-802
- Holt DJ (2006) Increased medial temporal lobe activation during the passive viewing of emotional and neutral facial expressions in schizophrenia. *Schizophrenia Research* 82:153-162
- Jogia J (2008) Pilot investigation of the changes in cortical activation during facial affect recognition with lamotrigine monotherapy in bipolar disorder. *British Journal of Psychiatry* 192:197-201
- Phillips ML (2004) Differential neural responses to overt and covert presentations of facial expressions of fear and disgust. *NeuroImage* 21:1484-1496
- Altshuler LL (2008) Regional brain changes in bipolar depression: A functional magnetic resonance imaging study. *Bipolar Disorders* 10:708-717

- Keightley ML (2007) Age-related differences in brain activity underlying identification of emotional expressions in faces. *Social Cognitive and Affective Neuroscience* 2:292-302
- Gu X (2007) Attention and reality constraints on the neural processes of empathy for pain. *NeuroImage* 36:256-267
- Ogino Y (2007) Inner experience of pain: Imagination of pain while viewing images showing painful events forms subjective pain representation in human brain. *Cerebral Cortex* 17:1139-1146
- Singer T (2004) Empathy for pain involves the affective but not sensory aspects of pain. *Science* 303:1157-1162
- Moriguchi Y (2007) Empathy and judging other's pain: An fMRI study of alexithymia. *Cerebral Cortex* 17:2223-2234
- Jackson PL (2006) Empathy examined through the neural mechanisms involved in imagining how I feel versus how you feel pain. *Neuropsychologia* 44:752-761
- Botvinick MM (2005) Viewing facial expressions of pain engages cortical areas involved in the direct experience of pain. *NeuroImage* 25:312-319
- Jackson PL (2005) How do we perceive the pain of others? A window into the neural processes involved in empathy. *NeuroImage* 24:771-779
- Saarela M, V (2007) The compassionate brain: Humans detect intensity of pain from another's face. *Cerebral Cortex* 17:230-237
- Cheng Y (2007) Expertise modulates the perception of pain in others. *Current Biology* 17:1708-1713
- Binder JR (1996) Function of the left planum temporale in auditory and linguistic processing. *Brain* 119:1239-1247
- Buckner RL (2000) Functional MRI evidence for a role of frontal and inferior temporal cortex in amodal components of priming. *Brain* 123:620-640
- Duzel E P (2001) Comparative electrophysiological and hemodynamic measures of neural activation during memory-retrieval. *Human Brain Mapping* 13:104-123
- Duzel E C (1999) Task-related and item-related brain processes of memory retrieval. *Proceedings of the National Academy of Sciences* 96:1794-1799

Kiehl KA (2002) Reading anomalous sentences: An event-related fMRI study of semantic processing. *NeuroImage* 17:842-850

Dehaene S N (2001) Cerebral mechanisms of word masking and unconscious repetition priming. *Nature Neuroscience* 4:752-758

Le CG (2000) Distinct cortical areas for names of numbers and body parts independent of language and input modality. *NeuroImage* 12:381-391

Skosnik PD (2002) Neural correlates of artificial grammar learning. *NeuroImage* 17:1306-1314

Belin P (2000) Voice-selective areas in human auditory cortex. *Nature* 403:309-311

Binder JR (2000) Human temporal lobe activation by speech and nonspeech sounds. *Cerebral Cortex* 10:512-528

Calvert GA (2003) Reading speech from still and moving faces: The neural substrates of visible speech. *Journal of Cognitive Neuroscience* 15:57-70

Grady CL (1998) Neural correlates of the episodic encoding of pictures and words. *Proceedings of the National Academy of Sciences* 95:2703-2708

Kuperberg GR (2000) Common and distinct neural substrates for pragmatic, semantic, and syntactic processing of spoken sentences: An fMRI study. *Journal of Cognitive Neuroscience* 12:321-341

Poldrack RA (1999) Functional specialization for semantic and phonological processing in the left inferior prefrontal cortex. *NeuroImage* 10:15-35

Roskies AL (2001) Task-dependent modulation of regions in the left inferior frontal cortex during semantic processing. *Journal of Cognitive Neuroscience* 13:829-843

Shaywitz BA (1995) Localization of semantic processing using functional magnetic resonance imaging. *Human Brain Mapping* 2:149-158

Noppeney U (2002) A PET study of stimulus- and task-induced semantic processing. *NeuroImage* 15:927-935

Phillips JA (2002) Can segregation within the semantic system account for category-specific deficits? *Brain* 125:2067-2080

- de ZG, I (2001) The semantic interference effect in the picture-word paradigm: An event-related fMRI study employing overt responses. *Human Brain Mapping* 14:218-227
- Petersen SE (1988) Positron emission tomographic studies of the cortical anatomy of single-word processing. *Nature* 331:585-589
- Hagoort P (1999) The neural circuitry involved in the reading of German words and pseudowords: A PET study. *Journal of Cognitive Neuroscience* 11:383-398
- Herbster AN (1997) Regional cerebral blood flow during word and nonword reading. *Human Brain Mapping* 5:84-92
- O'Leary DS (2002) Effects of smoking marijuana on brain perfusion and cognition. *Neuropsychopharmacology* 26:802-816
- O'Leary DS (2000) Acute marijuana effects on rCBF and cognition: A PET study. *Neuroreport* 11:3835-3841
- Thierry G (2003) Demand on verbal working memory delays haemodynamic response in the inferior prefrontal cortex. *Human Brain Mapping* 19:37-46
- Devlin JT (2003) Semantic processing in the left inferior prefrontal cortex: A combined functional magnetic resonance imaging and transcranial magnetic stimulation study. *Journal of Cognitive Neuroscience* 15:71-84
- Kang AM (1999) An event-related fMRI study of implicit phrase-level syntactic and semantic processing. *NeuroImage* 10:555-561
- Lurito JT (2000) Comparison of rhyming and word generation with FMRI. *Human Brain Mapping* 10:99-106
- Muller RA (1997) Receptive and expressive language activations for sentences: A PET study. *Neuroreport* 8:3767-3770
- Curtis VA (1998) Attenuated frontal activation during a verbal fluency task in patients with schizophrenia. *American Journal of Psychiatry* 155:1056-1063
- De Nil LF (2003) A positron emission tomography study of short and long term treatment effects on functional brain activation in adults who stutter. *Journal of Fluency Disorders* 28:357-380
- Friston KJ (1995) Analysis of fMRI time-series revisited. *NeuroImage* 2:45-53

Remy F (2003) Pain modulates cerebral activity during cognitive performance. *NeuroImage* 19:655-664

Stippich C (2003) Robust localization and lateralization of human language function: An optimized clinical functional magnetic resonance imaging protocol. *Neuroscience Letters* 346:109-113

Brammer MJ (1997) Generic brain activation mapping in functional magnetic resonance imaging: a nonparametric approach. *Magnetic Resonance Imaging* 15:763-770

Curtis VA (1999) Attenuated frontal activation in schizophrenia may be task dependent. *Schizophrenia Research* 37:35-44

Demonet JF (1992) The anatomy of phonological and semantic processing in normal subjects. *Brain* 115:1753-1768

Demonet JF (1994) A PET study of cognitive strategies in normal subjects during language tasks. Influence of phonetic ambiguity and sequence processing on phoneme monitoring. *Brain* 117:671-682

Frith CD (1991) Willed action and the prefrontal cortex in man: a study with PET. *Proceedings of the Royal Society of London. Series B. Biological Sciences* 244:241-246

Kuo WJ (2001) A left-lateralized network for reading Chinese words: a 3T fMRI study. *Neuroreport* 12:3997-4001

Schlosser R (1998) Functional magnetic resonance imaging of human brain activity in a verbal fluency task. *Journal of Neurology, Neurosurgery, and Psychiatry* 64:492-498

Howard D (1992) The cortical localization of the lexicons: Positron emission tomography evidence. *Brain* 115:1769-1782

Price CJ (1994) Brain activity during reading: The effects of exposure duration and task. *Brain* 117:1255-1269

Price CJ (1996) Hearing and saying: The functional neuro-anatomy of auditory word processing. *Brain* 119:919-931

Zurowski B (2002) Dissociating a common working memory network from different neural substrates of phonological and spatial stimulus processing. *NeuroImage* 15:45-57

Okada G (2003) Attenuated left prefrontal activation during a verbal fluency task in patients with depression. *Neuropsychobiology* 47:21-26

De Nil LF (2000) A positron emission tomography study of silent and oral single word reading in stuttering and nonstuttering adults. *Journal of Speech, Language, and Hearing Research* 43:1038-1053

Chao LL (2002) Experience-dependent modulation of category-related cortical activity. *Cerebral Cortex* 12:545-551

Chao LL (2000) Representation of manipulable man-made objects in the dorsal stream. *NeuroImage* 12:478-484

Martin A (1996) Neural correlates of category-specific knowledge. *Nature* 379:649-652

Price CJ (2003) Cortical localisation of the visual and auditory word form areas: A reconsideration of the evidence. *Brain and Language* 86:272-286

Price CJ (1996) The neural regions sustaining object recognition and naming. *Proceedings of the Royal Society of London. Series B. Biological Sciences* 263:1501-1507

Renvall K (2003) Naming multiple objects: neural correlates as measured by positron emission tomography. *Applied Neuropsychology* 10:224-233

Smith CD (2001) Differences in functional magnetic resonance imaging activation by category in a visual confrontation naming task. *Journal of Neuroimaging* 11:165-170

Thompson-Schill SL (1999) A neural basis for category and modality specificity of semantic knowledge. *Neuropsychologia* 37:671-676

Tyler LK (2004) Processing objects at different levels of specificity. *Journal of Cognitive Neuroscience* 16:351-362

Vandenberghe R (1996) Functional anatomy of a common semantic system for words and pictures. *Nature* 383:254-256

Vingerhoets G (2003) Multilingualism: An fMRI study. *NeuroImage* 20:2181-2196

Zelkowitz BJ (1998) An examination of regional cerebral blood flow during object naming tasks. *Journal of the International Neuropsychological Society* 4:160-166

Maguire EA (2004) The brain network associated with acquiring semantic knowledge. *NeuroImage* 22:171-178

- Booth JR (2004) Development of brain mechanisms for processing orthographic and phonologic representations. *Journal of Cognitive Neuroscience* 16:1234-1249
- Damasio H (1996) A neural basis for lexical retrieval. *Nature* 380:499-505
- Moore CJ (1999) Three distinct ventral occipitotemporal regions for reading and object naming. *NeuroImage* 10:181-192
- Poeppel D (2004) Auditory lexical decision, categorical perception, and FM direction discrimination differentially engage left and right auditory cortex. *Neuropsychologia* 42:183-200
- Votaw JR (1999) A confrontational naming task produces congruent increases and decreases in PET and fMRI. *NeuroImage* 10:347-356
- Vouloumanos A (2001) Detection of sounds in the auditory stream: Event-related fMRI evidence for differential activation to speech and nonspeech. *Journal of Cognitive Neuroscience* 13:994-1005
- Binder JR (2003) Neural correlates of lexical access during visual word recognition. *Journal of Cognitive Neuroscience* 15:372-393
- Cohen LG (2003) Visual word recognition in the left and right hemispheres: Anatomical and functional correlates of peripheral alexias. *Cerebral Cortex* 13:1313-1333
- Fiebach CJ (2002) fMRI evidence for dual routes to the mental lexicon in visual word recognition. *Journal of Cognitive Neuroscience* 14:11-23
- Petersen SE (1989) Positron emission tomographic studies of the processing of single words. *Journal of Cognitive Neuroscience* 1:153-170
- Petersen SE (1990) Activation of extrastriate and frontal cortical areas by visual words and word-like stimuli. *Science* 249:1041-1044
- Poldrack RA (2001) Relations between the neural bases of dynamic auditory processing and phonological processing: Evidence from fMRI. *Journal of Cognitive Neuroscience* 13:687-697
- Price CJ (1997) Segregating semantic from phonological processes during reading. *Journal of Cognitive Neuroscience* 9:727-733
- Siok WT (2004) Biological abnormality of impaired reading is constrained by culture. *Nature* 431:71-76



Calarge C (2003) Visualizing how one brain understands another: A PET study of theory of mind. *American Journal of Psychiatry* 160:1954-1964

Henke K (1999) Human hippocampus associates information in memory. *Proceedings of the National Academy of Sciences* 96:5884-5889

Peck KK (2004) Comparison of baseline conditions to investigate syntactic production using functional magnetic resonance imaging. *NeuroImage* 23:104-110

Riecker A (2000) Opposite hemispheric lateralization effects during speaking and singing at motor cortex, insula and cerebellum. *Neuroreport* 11:1997-2000

Drobyshevsky A (2006) A rapid fMRI task battery for mapping of visual, motor, cognitive, and emotional function. *NeuroImage* 31:732-744

Hamzei F (2003) The human action recognition system and its relationship to Broca's area: An fMRI study. *NeuroImage* 19:637-644

Rowan A (2004) Cortical lateralization during verb generation: A combined ERP and fMRI study. *NeuroImage* 22:665-675

Saccuman MC (2006) The impact of semantic reference on word class: An fMRI study of action and object naming. *NeuroImage* 32:1865-1878

Kumari V (2003) Neural abnormalities during cognitive generation of affect in treatment-resistant depression. *Biological Psychiatry* 54:771-791

Mo L (2005) Brain activation during semantic judgment of Chinese sentences: A functional MRI study. *Human Brain Mapping* 24:305-312

Poldrack RA (2001) Characterizing the neural mechanisms of skill learning and repetition priming: Evidence from mirror reading. *Brain* 124:67-82

Poldrack RA (1998) The neural basis of visual skill learning: An fMRI study of mirror reading. *Cerebral Cortex* 8:1-10

Martin A (1995) Discrete cortical regions associated with knowledge of color and knowledge of action. *Science* 270:102-105

Paulesu E G (1997) Functional heterogeneity of left inferior frontal cortex as revealed by fMRI. *Neuroreport* 8:2011-2016

- Pihlajamaki M (2000) Verbal fluency activates the left medial temporal lobe: A functional magnetic resonance imaging study. *Annals of Neurology* 47:470-476
- Shapiro KA (2006) Cortical signatures of noun and verb production. *Proceedings of the National Academy of Sciences* 103:1644-1649
- Tranel D (2005) Effects of noun-verb homonymy on the neural correlates of naming concrete entities and actions. *Brain and Language* 92:288-299
- Vitali P (2005) Generating animal and tool names: An fMRI study of effective connectivity. *Brain and Language* 93:32-45
- Gurd JM (2002) Posterior parietal cortex is implicated in continuous switching between verbal fluency tasks: An fMRI study with clinical implications. *Brain* 125:1024-1038
- Katzir T (2005) Imaging phonology without print: Assessing the neural correlates of phonemic awareness using fMRI. *NeuroImage* 27:106-115
- Kemeny S Y (2005) Comparison of continuous overt speech fMRI using BOLD and arterial spin labeling. *Human Brain Mapping* 24:173-183
- Voets NL (2006) Distinct right frontal lobe activation in language processing following left hemisphere injury. *Brain* 129:754-766
- Mummery CJ (1996) Generating 'tiger' as an animal name or a word beginning with T: Differences in brain activation. *Proceedings of the Royal Society of London. Series B. Biological Sciences* 263:989-995
- Audenaert K (2000) Verbal fluency as a prefrontal activation probe: A validation study using 99m Tc-ECD brain SPET. *European Journal of Nuclear Medicine* 27:1800-1808
- Fu CHY (2005) Effects of psychotic state and task demand on prefrontal function in schizophrenia: An fMRI study of overt verbal fluency. *American Journal of Psychiatry* 162:485-494
- Fu CHY (2002) A functional magnetic resonance imaging study of overt letter verbal fluency using a clustered acquisition sequence: Greater anterior cingulate activation with increased task demand. *NeuroImage* 17:871-879
- Allen PP (2006) Effect of acute tryptophan depletion on pre-frontal engagement. *Psychopharmacology* 187:486-497
- Kotz SA (2003) On the lateralization of emotional prosody: An event-related functional MR investigation. *Brain and Language* 86:366-376

Smith CD (2002) Women at risk for AD show increased parietal activation during a fluency task. *Neurology* 58:1197-1202

Jardri R (2007) Self awareness and speech processing: An fMRI study. *NeuroImage* 35:1645-1653

Ravnikilde B (2002) Putative tests of frontal lobe function: A PET-study of brain activation during Stroop's test and verbal fluency. *Journal of Clinical and Experimental Neuropsychology* 24:534-547

Jobard G (2007) Impact of modality and linguistic complexity during reading and listening tasks. *NeuroImage* 34:784-800

Frankenstein UN (2001) Distraction modulates anterior cingulate gyrus activations during the cold pressor test. *NeuroImage* 14:827-836

Dick F (2007) What is involved and what is necessary for complex linguistic and nonlinguistic auditory processing: Evidence from functional magnetic resonance imaging and lesion data. *Journal of Cognitive Neuroscience* 19:799-816

Seghier ML (2008) Group analysis and the subject factor in the functional magnetic resonance imaging: Analysis of fifty right-handed healthy subjects in a semantic language task. *Human Brain Mapping* 29:461-477

Meschyan G (2006) Impact of language proficiency and orthographic transparency on bilingual word reading: An fMRI investigation. *NeuroImage* 29:1135-1140

Perani D (1996) Brain processing of native and foreign language. *Neuroreport* 7:2439-2444

Eddington KM (2007) Neural correlates of promotion and prevention goal activation: An fMRI study using an idiographic approach. *Journal of Cognitive Neuroscience* 19:1152-1162

Liu Y (2007) Evidence for neural accommodation to a writing system following learning. *Human Brain Mapping* 28:1223-1234

Thompson CK (2007) Neural correlates of verb argument structure processing. *Journal of Cognitive Neuroscience* 19:1753-1767

Ilg R (2007) Neural processes underlying intuitive coherence judgments as revealed by fMRI on a semantic judgment task. *NeuroImage* 38:228-238

- Shibata M (2007) Neural mechanisms involved in the comprehension of metaphoric and literal sentences: An fMRI study. *Brain Research* 1166:92-102
- Prince SE (2005) Neural correlates of relational memory: Successful encoding and retrieval of semantic and perceptual associations. *Journal of Neuroscience* 25:1203-1210
- Haller S R (2005) Overt sentence production in event-related fMRI. *Neuropsychologia* 43:807-814
- Grossman M (2003) Neural basis for semantic memory difficulty in Alzheimer's disease: An fMRI study. *Brain* 126:292-311
- Klein D (2001) A cross-linguistic PET study of tone perception in Mandarin Chinese and English speakers. *NeuroImage* 13:646-653
- Booth JR (2002) Modality independence of word comprehension. *Human Brain Mapping* 16:251-261
- Simon O (2002) Topographical layout of hand, eye, calculation, and language-related areas in the human parietal lobe. *Neuron* 33:475-487
- Meyer ME (2002) FMRI reveals brain regions mediating slow prosodic modulations in spoken sentences. *Human Brain Mapping* 17:73-88
- Mechelli A (2000) The effects of presentation rate during word and pseudoword reading: a comparison of PET and fMRI. *Journal of Cognitive Neuroscience* 12 Supplement 2:145-156
- Dapretto M (1999) Form and content: Dissociating syntax and semantics in sentence comprehension. *Neuron* 24:427-432
- Gandour J (2003) A cross-linguistic fMRI study of perception of intonation and emotion in Chinese. *Human Brain Mapping* 18:149-157
- Beauregard M (1997) The neural substrate for concrete, abstract, and emotional word lexica: A positron emission tomography study. *Journal of Cognitive Neuroscience* 9:441-461
- Fiez JA (1996) A positron emission tomography study of the short-term maintenance of verbal information. *Journal of Neuroscience* 16:808-822
- Zald DH (2002) Neural correlates of tasting concentrated quinine and sugar solutions. *Journal of Neurophysiology* 87:1068-1075

de A, I (2003) Representation of umami taste in the human brain. *Journal of Neurophysiology* 90:313-319

de A, I (2003) Taste-olfactory convergence, and the representation of the pleasantness of flavour, in the human brain. *European Journal of Neuroscience* 18:2059-2068

Zald DH (1998) Aversive gustatory stimulation activates limbic circuits in humans. *Brain* 121:1143-1154

Berns GS (2001) Predictability modulates human brain response to reward. *Journal of Neuroscience* 21:2793-2798

Schoenfeld MA (2004) Functional magnetic resonance tomography correlates of taste perception in the human primary taste cortex. *Neuroscience* 127:347-353

Haase L (2007) On-line psychophysical data acquisition and event-related fMRI protocol optimized for the investigation of brain activation in response to gustatory stimuli. *Journal of Neuroscience Methods* 159:98-107

Francis ST (1999) The representation of pleasant touch in the brain and its relationship with taste and olfactory areas. *Neuroreport* 10:453-459

de A, I (2004) Representation in the human brain of food texture and oral fat. *Journal of Neuroscience* 24:3086-3093

Kobayashi M (2004) Functional imaging of gustatory perception and imagery: "Top-down" processing of gustatory signals. *NeuroImage* 23:1271-1282

O'Doherty J (2001) Representation of pleasant and aversive taste in the human brain. *Journal of Neurophysiology* 85:1315-1321

Ogawa H (2005) Functional MRI detection of activation in the primary gustatory cortices in humans. *Chemical Senses* 30:583-592

Small DM (2003) Dissociation of neural representation of intensity and affective valuation in human gustation. *Neuron* 39:701-711

Arnou BA (2002) Brain activation and sexual arousal in healthy, heterosexual males. *Brain* 125:1014-1023

Athwal BS (2001) Brain responses to changes in bladder volume and urge to void in healthy men. *Brain* 124:369-377

- Brannan SK (2001) Neuroimaging of cerebral activations and deactivations associated with hypercapnia and hunger for air. *Proceedings of the National Academy of Sciences* 98:2029-2034
- Liotti M (2001) Brain responses associated with consciousness of breathlessness (air hunger). *Proceedings of the National Academy of Sciences* 98:2035-2040
- Parsons LM (2001) Neuroimaging evidence implicating cerebellum in the experience of hypercapnia and hunger for air. *Proceedings of the National Academy of Sciences* 98:2041-2046
- Beauregard M (2001) Neural correlates of conscious self-regulation of emotion. *Journal of Neuroscience* 21:1-6
- Karama S L (2002) Areas of brain activation in males and females during viewing of erotic film excerpts. *Human Brain Mapping* 16:1-13
- Rauch SL (1999) Neural activation during sexual and competitive arousal in healthy men. *Psychiatry Research* 91:1-10
- Redoute J (2000) Brain processing of visual sexual stimuli in human males. *Human Brain Mapping* 11:162-177
- Nunneley SA (2002) Changes in regional cerebral metabolism during systemic hyperthermia in humans. *Journal of Applied Physiology* 92:846-851
- Britton JC (2006) Neural correlates of social and nonsocial emotions: An fMRI study. *NeuroImage* 31:397-409
- Desseilles M (2006) A prominent role for amygdaloid complexes in the Variability in Heart Rate (VHR) during Rapid Eye Movement (REM) sleep relative to wakefulness. *NeuroImage* 32:1008-1015
- Porubska K (2006) Subjective feeling of appetite modulates brain activity: An fMRI study. *NeuroImage* 32:1273-1280
- Smeets PAM (2006) Effect of satiety on brain activation during chocolate tasting in men and women. *American Journal of Clinical Nutrition* 83:1297-1305
- Uher R (2006) Cerebral processing of food-related stimuli: Effects of fasting and gender. *Behavioural Brain Research* 169:111-119

Blok BFM (1997) A PET study on brain control of micturition in humans. *Brain* 120:111-121

Blok BFM (1998) Brain activation during micturition in women. *Brain* 121:2033-2042

Wu J (1999) Prediction of antidepressant effects of sleep deprivation by metabolic rates in the ventral anterior cingulate and medial prefrontal cortex. *American Journal of Psychiatry* 156:1149-1158

de A, I (2003) Human cortical responses to water in the mouth, and the effects of thirst. *Journal of Neurophysiology* 90:1865-1876

Denton D (1999) Correlation of regional cerebral blood flow and change of plasma sodium concentration during genesis and satiation of thirst. *Proceedings of the National Academy of Sciences* 96:2532-2537

Egan GF (2003) Neural correlates of the emergence of consciousness of thirst. *Proceedings of the National Academy of Sciences* 100:15241-15246

Fukuyama H (1996) Neural control of micturition in man examined with single photon emission computed tomography using 99mTc-HMPAO. *Neuroreport* 7:3009-3012

Kuhtz-Buschbeck JP (2005) Cortical representation of the urge to void: A functional magnetic resonance imaging study. *Journal of Urology* 174:1477-1481

Matsuura S K (2002) Human brain region response to distention or cold stimulation of the bladder: A positron emission tomography study. *Journal of Urology* 168:2035-2039

Nour S S (2000) Cerebral activation during micturition in normal men. *Brain* 123:781-789

Seseke S B (2006) Voluntary pelvic floor muscle control - An fMRI study. *NeuroImage* 31:1399-1407

Denton D (1999) Neuroimaging of genesis and satiation of thirst and an interoceptor-driven theory of origins of primary consciousness. *Proceedings of the National Academy of Sciences* 96:5304-5309

Farrell MJ (2006) Unique, common, and interacting cortical correlates of thirst and pain. *Proceedings of the National Academy of Sciences* 103:2416-2421

- Yin Y (2006) Cerebral activation during withholding urine with full bladder in healthy men using 99mTc-HMPAO SPECT. *Journal of Nuclear Medicine* 47:1093-1098
- Killgore WDS (2003) Cortical and limbic activation during viewing of high- versus low-calorie foods. *NeuroImage* 19:1381-1394
- Tataranni PA (1999) Neuroanatomical correlates of hunger and satiation in humans using positron emission tomography. *Proceedings of the National Academy of Sciences* 96:4569-4574
- Safron A (2007) Neural correlates of sexual arousal in homosexual and heterosexual men. *Behavioral Neuroscience* 121:237-248
- Ferretti A (2005) Dynamics of male sexual arousal: Distinct components of brain activation revealed by fMRI. *NeuroImage* 26:1086-1096
- Mehnert U (2008) Brain activation in response to bladder filling and simultaneous stimulation of the dorsal clitoral nerve--An fMRI study in healthy women. *NeuroImage* 41:682-689
- Kim SW (2006) Brain activation by visual erotic stimuli in healthy middle aged males. *International Journal of Impotence Research* 18:452-457
- Lowell SY (2008) Sensory stimulation activates both motor and sensory components of the swallowing system. *NeuroImage* 42:285-295
- Miyagawa Y (2007) Differential brain processing of audiovisual sexual stimuli in men: Comparative positron emission tomography study of the initiation and maintenance of penile erection during sexual arousal. *NeuroImage* 36:830-842
- Ponseti J (2006) A functional endophenotype for sexual orientation in humans. *NeuroImage* 33:825-833
- Stark R (2005) Erotic and disgust-inducing pictures--Differences in the hemodynamic responses of the brain. *Biological Psychology* 70:19-29
- Stoleru S G (1999) Neuroanatomical correlates of visually evoked sexual arousal in human males. *Archives of Sexual Behavior* 28:1-21
- Tsujimura A (2006) Brain processing of audiovisual sexual stimuli inducing penile erection: A positron emission tomography study. *Journal of Urology* 176:679-683
- McKay LC (2008) A bilateral cortico-bulbar network associated with breath holding in humans, determined by functional magnetic resonance imaging. *NeuroImage* 40:1824-1832



- Moulier V (2006) Neuroanatomical correlates of penile erection evoked by photographic stimuli in human males. *NeuroImage* 33:689-699
- Anderson ND (2000) The effects of divided attention on encoding- and retrieval-related brain activity: A PET study of younger and older adults. *Journal of Cognitive Neuroscience* 12:775-792
- Buckner RL (1998) Functional-anatomical study of episodic retrieval using fMRI I. Retrieval effort versus retrieval success. *NeuroImage* 7:151-162
- Cabeza R (2002) Similarities and differences in the neural correlates of episodic memory retrieval and working memory. *NeuroImage* 16:317-330
- Duzel E P (2001) Comparative electrophysiological and hemodynamic measures of neural activation during memory-retrieval. *Human Brain Mapping* 13:104-123
- Duzel E C (1999) Task-related and item-related brain processes of memory retrieval. *Proceedings of the National Academy of Sciences* 96:1794-1799
- Halsband U (1998) Encoding and retrieval in declarative learning: A positron emission tomography study. *Behavioural Brain Research* 97:69-78
- Herath P (2001) Visual recognition: Evidence for two distinctive mechanisms from a PET study. *Human Brain Mapping* 12:110-119
- Lee TMC (2002) Lie detection by functional magnetic resonance imaging. *Human Brain Mapping* 15:157-164
- Leveroni CL (2000) Neural systems underlying the recognition of familiar and newly learned faces. *Journal of Neuroscience* 20:878-886
- Nyberg L (1996) Network analysis of positron emission tomography regional cerebral blood flow data: Ensemble inhibition during episodic memory retrieval. *Journal of Neuroscience* 16:3753-3759
- Tsukiura T (2002) Medial temporal lobe activation during context-dependent relational processes in episodic retrieval: An fMRI study. *Human Brain Mapping* 17:203-213
- Grady CL (2001) An examination of the effects of stimulus type, encoding task, and functional connectivity on the role of right prefrontal cortex in recognition memory. *NeuroImage* 14:556-571

- Lepage M (2001) Transperceptual encoding and retrieval processes in memory: a PET study of visual and haptic objects. *NeuroImage* 14:572-584
- Nyberg L (1996) General and specific brain regions involved in encoding and retrieval of events: What, where, and when. *Proceedings of the National Academy of Sciences* 93:11280-11285
- Squire LR (1992) Activation of the hippocampus in normal humans: A functional anatomical study of memory. *Proceedings of the National Academy of Sciences* 89:1837-1841
- Mench WE (2000) Network analysis of brain activations in working memory: Behavior and age relationships. *Microscopy Research and Technique* 51:64-74
- Andreasen NC (2003) The cerebellum plays a role in conscious episodic memory retrieval. *Human Brain Mapping* 8:226-234
- Crespo-Facorro B (2001) Neural basis of novel and well-learned recognition memory in schizophrenia: A positron emission tomography study. *Human Brain Mapping* 12:219-231
- Eldridge LL (2000) Remembering episodes: A selective role for the hippocampus during retrieval. *Nature Neuroscience* 3:1149-1152
- Sugiura M (2001) Activation reduction in anterior temporal cortices during repeated recognition of faces of personal acquaintances. *NeuroImage* 13:877-890
- Herrmann M (2001) Control of semantic interference in episodic memory retrieval is associated with an anterior cingulate-prefrontal activation pattern. *Human Brain Mapping* 13:94-103
- Paller KA (2003) Neural correlates of person recognition. *Learning & Memory* 10:253-260
- Miller MB (2002) Extensive individual differences in brain activations associated with episodic retrieval are reliable over time. *Journal of Cognitive Neuroscience* 14:1200-1214
- Braver TS (2001) Direct comparison of prefrontal cortex regions engaged by working and long-term memory tasks. *NeuroImage* 14:48-59
- Cansino S M (2002) Brain activity underlying encoding and retrieval of source memory. *Cerebral Cortex* 12:1048-1056
- Suzuki M (2002) Neural basis of temporal context memory: A functional MRI study. *NeuroImage* 17:1790-1796

- Zysset S M (2001) Retrieval of long and short lists from long term memory: A functional magnetic resonance imaging study with human subjects. *Neuroscience Letters* 314:1-4
- Cabeza R (2003) Lateralization of prefrontal activity during episodic memory retrieval: Evidence for the production-monitoring hypothesis. *Journal of Cognitive Neuroscience* 15:249-259
- Jackson IO (2004) Encoding activity in anterior medial temporal lobe supports subsequent associative recognition. *NeuroImage* 21:456-462
- van TM (2003) Modulation of neural activity during object naming: Effects of time and practice. *Cerebral Cortex* 13:381-391
- Cabeza R (2003) Attention-related activity during episodic memory retrieval: A cross-function fMRI study. *Neuropsychologia* 41:390-399
- Ragland JD (1998) Frontotemporal cerebral blood flow change during executive and declarative memory tasks in schizophrenia: A positron emission tomography study. *Neuropsychology* 12:399-413
- Daselaar SM (2001) Parahippocampal activation during successful recognition of words: A self-paced event-related fMRI study. *NeuroImage* 13:1113-1120
- Ino T (2004) Neural substrates of the performance of an auditory verbal memory: Between-subjects analysis by fMRI. *Brain Research Bulletin* 64:115-126
- Mottaghy FM (1999) Neuronal correlates of encoding and retrieval in episodic memory during a paired-word association learning task: A functional magnetic resonance imaging study. *Experimental Brain Research* 128:332-342
- Sperling RA (2003) Putting names to faces: Successful encoding of associative memories activates the anterior hippocampal formation. *NeuroImage* 20:1400-1410
- Bonner-Jackson A (2005) The influence of encoding strategy on episodic memory and cortical activity in schizophrenia. *Biological Psychiatry* 58:47-55
- Buckner RL (1996) Functional anatomic studies of memory retrieval for auditory words and visual pictures. *Journal of Neuroscience* 16:6219-6235
- Cabeza R (1997) Age-related differences in effective neural connectivity during encoding and recall. *Neuroreport* 8:3479-3483

Fletcher PC (1996) Brain activity during memory retrieval. The influence of imagery and semantic cueing. *Brain* 119:1587-1596

Halsband U (2006) Learning in trance: Functional brain imaging studies and neuropsychology. *Journal of Physiology - Paris* 99:470-482

Hofer A (2003) An fMRI study of episodic encoding and recognition of words in patients with schizophrenia in remission. *American Journal of Psychiatry* 160:911-918

Fliessbach K (2006) The effect of word concreteness on recognition memory. *NeuroImage* 32:1413-1421

Vandekerckhove MMP (2005) Bi-hemispheric engagement in the retrieval of autobiographical episodes. *Behavioural Neurology* 16:203-210

Dupont S S (2002) Anatomy of verbal memory: A functional MRI study. *Surgical and Radiologic Anatomy* 24:57-63

Ries ML (2006) Task-dependent posterior cingulate activation in mild cognitive impairment. *NeuroImage* 29:485-492

Woodard JL (2007) Temporally graded activation of neocortical regions in response to memories of different ages. *Journal of Cognitive Neuroscience* 19:1113-1124

Maril A (2003) Feeling-of-knowing in episodic memory: An event-related fMRI study. *NeuroImage* 18:827-836

Hofer A (2007) Neural substrates for episodic encoding and recognition of unfamiliar faces. *Brain and Cognition* 63:174-181

Kensinger EA (2007) Remembering the specific visual details of presented objects: Neuroimaging evidence for effects of emotion. *Neuropsychologia* 45:2951-2962

Denkova E B (2006) Neural correlates of remembering/knowing famous people: An event-related fMRI study. *Neuropsychologia* 44:2783-2791

Neuner I (2007) Wechsler Memory Scale Revised Edition: Neural correlates of the visual paired associates subtest adapted for fMRI. *Brain Research* 1177:66-78

Pihlajamaki M (2003) Encoding of novel picture pairs activates the perirhinal cortex: An fMRI study. *Hippocampus* 13:67-80

Assaf M (2006) Abnormal object recall and anterior cingulate overactivation correlate with formal thought disorder in schizophrenia. *Biological Psychiatry* 59:452-459

Ragland JD (2001) Effect of schizophrenia on frontotemporal activity during word encoding and recognition: A PET cerebral blood flow study. *American Journal of Psychiatry* 158:1114-1125

Weiss AP (2006) Fronto-hippocampal function during temporal context monitoring in schizophrenia. *Biological Psychiatry* 60:1268-1277

Fletcher PC (1998) Brain activations in schizophrenia during a graded memory task studied with functional neuroimaging. *Archives of General Psychiatry* 55:1001-1008

Heckers S R (1998) Impaired recruitment of the hippocampus during conscious recollection in schizophrenia. *Nature Neuroscience* 1:318-323

Daselaar SM (2006) Triple dissociation in the medial temporal lobes: Recollection, familiarity, and novelty. *Journal of Neurophysiology* 96:1902-1911

Dobbins IG (2003) Memory orientation and success: Separable neurocognitive components underlying episodic recognition. *Neuropsychologia* 41:318-333

Johnson JD (2007) Recollection and the reinstatement of encoding-related cortical activity. *Cerebral Cortex* 17:2507-2515

Henson RNA (1999) Recollection and familiarity in recognition memory: An event-related functional magnetic resonance imaging study. *Journal of Neuroscience* 19:3962-3972

Murray LJ (2007) The dorsolateral prefrontal cortex contributes to successful relational memory encoding. *Journal of Neuroscience* 27:5515-5522

Peters J (2007) Domain-specific retrieval of source information in the medial temporal lobe. *European Journal of Neuroscience* 26:1333-1343

Andreasen NC (1995) Remembering the past: Two facets of episodic memory explored with positron emission tomography. *American Journal of Psychiatry* 152:1576-1585

Burianova H (2007) Common and unique neural activations in autobiographical, episodic, and semantic retrieval. *Journal of Cognitive Neuroscience* 19:1520-1534

Mainero C (2004) fMRI evidence of brain reorganization during attention and memory tasks in multiple sclerosis. *NeuroImage* 21:858-867

Lanius RA (2004) The nature of traumatic memories: A 4-T fMRI functional connectivity analysis. *American Journal of Psychiatry* 161:36-44

Lanius RA (2007) Neural correlates of trauma script-imagery in posttraumatic stress disorder with and without comorbid major depression: A functional MRI investigation. *Psychiatry Research* 155:45-56

Desmurget M (2001) Functional anatomy of nonvisual feedback loops during reaching: a positron emission tomography study. *Journal of Neuroscience* 21:2919-2928

Ehrsson HH (2000) Simultaneous movements of upper and lower limbs are coordinated by motor representations that are shared by both limbs: a PET study. *European Journal of Neuroscience* 12:3385-3398

Gosain AK (2001) Localization of the cortical response to smiling using new imaging paradigms with functional magnetic resonance imaging. *Plastic and Reconstructive Surgery* 108:1136-1144

Indovina I (2001) Combined visual attention and finger movement effects on human brain representations. *Experimental Brain Research* 140:265-279

Rao SM (1997) Distributed neural systems underlying the timing of movements. *Journal of Neuroscience* 17:5528-5535

van MH (1998) Changes in brain activity during motor learning measured with PET: Effects of hand of performance and practice. *Journal of Neurophysiology* 80:2177-2199

Gerardin E S (2000) Partially overlapping neural networks for real and imagined hand movements. *Cerebral Cortex* 10:1093-1104

Simon O (2002) Topographical layout of hand, eye, calculation, and language-related areas in the human parietal lobe. *Neuron* 33:475-487

Gelnar PA (1999) A comparative fMRI study of cortical representations for thermal painful, vibrotactile, and motor performance tasks. *NeuroImage* 10:460-482

Colebatch JG (1991) Regional cerebral blood flow during voluntary arm and hand movements in human subjects. *Journal of Neurophysiology* 65:1392-1401

Grafton ST (1993) Within-arm somatotopy in human motor areas determined by positron emission tomography. *Experimental Brain Research* 95:172-176

- Lotze M (2000) The representation of articulation in the primary sensorimotor cortex. *Neuroreport* 11:2985-2989
- Winstein CJ (1997) Motor task difficulty and brain activity: Investigation of goal-directed reciprocal aiming using positron emission tomography. *Journal of Neurophysiology* 77:1581-1594
- Corfield DR (1999) Cortical and subcortical control of tongue movement in humans: a functional neuroimaging study using fMRI. *Journal of Applied Physiology* 86:1468-1477
- Carey LM (2000) The functional neuroanatomy and long-term reproducibility of brain activation associated with a simple finger tapping task in older, healthy volunteers: a serial PET study. *NeuroImage* 11:124-144
- Kawashima R (2000) The effect of verbal feedback on motor learning-a PET study. *NeuroImage* 12:698-706
- Umetsu A (2002) Brain activation during the fist-edge-palm test: A functional MRI study. *NeuroImage* 17:385-392
- Binkofski F (2000) Broca's region subserves imagery of motion: a combined cytoarchitectonic and fMRI study. *Human Brain Mapping* 11:273-285
- Inoue K (2001) Activation in the ipsilateral posterior parietal cortex during tool use: a PET study. *NeuroImage* 14:1469-1475
- Menon V (2001) Error-related brain activation during a Go/NoGo response inhibition task. *Human Brain Mapping* 12:131-143
- Casey BJ (1998) Reproducibility of fMRI results across four institutions using a spatial working memory task. *NeuroImage* 8:249-261
- Ehrsson HH (2001) Differential fronto-parietal activation depending on force used in a precision grip task: an fMRI study. *Journal of Neurophysiology* 85:2613-2623
- Grafton ST (1992) Functional anatomy of human procedural learning determined with regional cerebral blood flow and PET. *Journal of Neuroscience* 12:2542-2548
- Maldjian JA (1998) The sensory somatotopic map of the human hand demonstrated at 4 Tesla. *NeuroImage* 10:55-62

- Blinkenberg M (1996) Rate dependence of regional cerebral activation during performance of a repetitive motor task: a PET study. *Journal of Cerebral Blood Flow and Metabolism* 16:794-803
- Catalan MJ (1998) The functional neuratomy of simple and complex sequential finger movements: a PET study. *Brain* 121:253-264
- Joliot M (1998) Anatomical congruence of metabolic and electromagnetic activation signals during a self-paced motor task: A combined PET-MEG study. *NeuroImage* 7:337-351
- Lerner A (2004) Regional cerebral blood flow correlates of the severity of writer's cramp symptoms. *NeuroImage* 21:904-913
- Ramsey NF (1996) Functional mapping of human sensorimotor cortex with 3D BOLD fMRI correlates highly with H2(15)O PET rCBF. *Journal of Cerebral Blood Flow and Metabolism* 16:755-764
- Astafiev S, V (2003) Functional organization of human intraparietal and frontal cortex for attending, looking, and pointing. *Journal of Neuroscience* 23:4689-4699
- Connolly JD (2000) A comparison of frontoparietal fMRI activation during anti-saccades and anti-pointing. *Journal of Neurophysiology* 84:1645-1655
- Watanabe J (2004) The human parietal cortex is involved in spatial processing of tongue movements -- an fMRI study. *NeuroImage* 21:1289-1299
- De LM (2005) Blood oxygenation level dependent contrast resting state networks are relevant to functional activity in the neocortical sensorimotor system. *Experimental Brain Research* 167:587-594
- Wilson SM (2004) Listening to speech activates motor areas involved in speech production. *Nature Neuroscience* 7:701-702
- Nowak M (2005) "Central command" and insular activation during attempted foot lifting in paraplegic humans. *Human Brain Mapping* 25:259-265
- Wong SW (2007) Ventral medial prefrontal cortex and cardiovagal control in conscious humans. *NeuroImage* 35:698-708
- Mallol R (2007) Compensatory cortical mechanisms in Parkinson's disease evidenced with fMRI during the performance of pre-learned sequential movements. *Brain Research* 1147:265-271



- Milner TE (2007) Central control of grasp: Manipulation of objects with complex and simple dynamics. *NeuroImage* 36:388-395
- Ghatan PH (1995) Brain activation induced by the perceptual maze test: A PET study of cognitive performance. *NeuroImage* 2:112-124
- Blok BFM (1997) A PET study on cortical and subcortical control of pelvic floor musculature in women. *Journal of Comparative Neurology* 389:535-544
- Gavazzi C (2007) Combining functional and structural brain magnetic resonance imaging in Huntington disease. *Journal of Computer Assisted Tomography* 31:574-580
- Lissek S H (2007) Sex differences in cortical and subcortical recruitment during simple and complex motor control: An fMRI study. *NeuroImage* 37:912-926
- Simon O (2004) Automatized clustering and functional geometry of human parietofrontal networks for language, space, and number. *NeuroImage* 23:1192-1202
- Leslie KR (2004) Functional imaging of face and hand imitation: Towards a motor theory of empathy. *NeuroImage* 21:601-607
- Martin RE (2004) Cerebral areas processing swallowing and tongue movement are overlapping but distinct: A functional magnetic resonance imaging study. *Journal of Neurophysiology* 92:2428-2443
- Mostofsky SH (2006) Atypical motor and sensory cortex activation in attention-deficit/hyperactivity disorder: A functional magnetic resonance imaging study of simple sequential finger tapping. *Biological Psychiatry* 59:48-56
- Onozuka M (2002) Mapping brain region activity during chewing: A functional magnetic resonance imaging study. *Journal of Dental Research* 81:743-746
- Onozuka M (2003) Age-related changes in brain regional activity during chewing: A functional magnetic resonance imaging study. *Journal of Dental Research* 82:657-660
- Stephan KM (1995) Functional anatomy of the mental representation of upper extremity movements in healthy subjects. *Journal of Neurophysiology* 73:373-386
- Brown S N (2008) A larynx area in the human motor cortex. *Cerebral Cortex* 18:837-845
- Gerardin E L (2003) Foot, hand, face and eye representation in the human striatum. *Cerebral Cortex* 13:162-169

- Hamdy S R (1999) Identification of the cerebral loci processing human swallowing with H<sub>2</sub>(15)O PET activation. *Journal of Neurophysiology* 81:1917-1926
- Harris ML (2005) Mapping metabolic brain activation during human volitional swallowing: A positron emission tomography study using [18F]fluorodeoxyglucose. *Journal of Cerebral Blood Flow and Metabolism* 25:520-526
- Wild B (2003) Why are smiles contagious? An fMRI study of the interaction between perception of facial affect and facial movements. *Psychiatry Research* 123:17-36
- Fesl G (2003) Inferior central sulcus: Variations of anatomy and function on the example of the motor tongue area. *NeuroImage* 20:601-610
- Rotte M (2002) Functional magnetic resonance imaging for the evaluation of the motor system: Primary and secondary brain areas in different motor tasks. *Stereotactic and Functional Neurosurgery* 78:3-16
- Hanakawa T (2008) Motor planning, imagery, and execution in the distributed motor network: A time-course study with functional MRI. *Cerebral Cortex*
- Martin RE (2001) Cerebral cortical representation of automatic and volitional swallowing in humans. *Journal of Neurophysiology* 85:938-950
- Dziewas R (2003) Neuroimaging evidence for cortical involvement in the preparation and in the act of swallowing. *NeuroImage* 20:135-144
- Fraser C (2002) Driving plasticity in human adult motor cortex is associated with improved motor function after brain injury. *Neuron* 34:831-840
- Furlong PL (2004) Dissociating the spatio-temporal characteristics of cortical neuronal activity associated with human volitional swallowing in the healthy adult brain. *NeuroImage* 22:1447-1455
- Guillot A (2008) Brain activity during visual versus kinesthetic imagery: An fMRI study. *Human Brain Mapping*
- Martin R (2007) Cerebral cortical processing of swallowing in older adults. *Experimental Brain Research* 176:12-22
- Bengtsson SL (2005) Effector-independent voluntary timing: Behavioural and neuroimaging evidence. *European Journal of Neuroscience* 22:3255-3265

Poellinger A (2001) Activation and habituation in olfaction - An fMRI study. *NeuroImage* 13:547-560

Savic I (2000) Olfactory functions are mediated by parallel and hierarchical processing. *Neuron* 26:735-745

Savic I (2001) Smelling of odorous sex hormone-like compounds causes sex-differentiated hypothalamic activations in humans. *Neuron* 31:661-668

Zatorre RJ (2000) Neural mechanisms involved in odor pleasantness and intensity judgements. *Neuroreport* 11:2711-2716

Sobel N (2000) Time course of odorant-induced activation in the human primary olfactory cortex. *Journal of Neurophysiology* 83:537-551

Bengtsson S B (2001) Brain activation during odor perception in males and females. *Neuroreport* 12:2027-2033

de A, I (2003) Taste-olfactory convergence, and the representation of the pleasantness of flavour, in the human brain. *European Journal of Neuroscience* 18:2059-2068

Rolls ET (2003) Different representations of pleasant and unpleasant odours in the human brain. *European Journal of Neuroscience* 18:695-703

Francis ST (1999) The representation of pleasant touch in the brain and its relationship with taste and olfactory areas. *Neuroreport* 10:453-459

Ciomas C (2008) Imaging of odor perception delineates functional disintegration of the limbic circuits in mesial temporal lobe epilepsy. *NeuroImage* 39:578-592

Suzuki Y (2001) Functional magnetic resonance imaging of odor identification: The effect of aging. *Journal of Gerontology* 56A:756-760

Zatorre RJ (1992) Functional localization and lateralization of human olfactory cortex. *Nature* 360:339-340

Gelnar PA (1999) A comparative fMRI study of cortical representations for thermal painful, vibrotactile, and motor performance tasks. *NeuroImage* 10:460-482

Coghill RC (1994) Distributed processing of pain and vibration by the human brain. *Journal of Neuroscience* 14:4095-4108

- Ploner M (2000) Differential organization of touch and pain in human primary somatosensory cortex. *Journal of Neurophysiology* 83:1770-1776
- Derbyshire SWG (1998) Pain and Stroop interference tasks activate separate processing modules in anterior cingulate cortex. *Experimental Brain Research* 118:52-60
- Becerra LR (1999) Human brain activation under controlled thermal stimulation and habituation to noxious heat: an fMRI study. *Magnetic Resonance in Medicine* 41:1044-1057
- Bingel U (2002) Subcortical structures involved in pain processing: evidence from single-trial fMRI. *Pain* 99:313-321
- Bornhovd K (2002) Painful stimuli evoke different stimulus-response functions in the amygdala, prefrontal, insula and somatosensory cortex: a single-trial fMRI study. *Brain* 125:1326-1336
- Casey KL (1996) Comparison of human cerebral activation pattern during cutaneous warmth, heat pain, and deep cold pain. *Journal of Neurophysiology* 76:571-581
- Coghill RC (2001) Hemispheric lateralization of somatosensory processing. *Journal of Neurophysiology* 85:2602-2612
- Coghill RC (1999) Pain intensity processing within the human brain: a bilateral, distributed mechanism. *Journal of Neurophysiology* 82:1934-1943
- Coghill RC (2003) Neural correlates of interindividual differences in the subjective experience of pain. *Proceedings of the National Academy of Sciences* 100:8538-8542
- Giesecke T (2004) Evidence of augmented central pain processing in idiopathic chronic low back pain. *Arthritis & Rheumatism* 50:613-623
- Ibinson JW (2004) Functional magnetic resonance imaging studies of pain: an investigation of signal decay during and across sessions. *Anesthesiology* 101:960-969
- Nemoto H (2003) Fluvoxamine modulates pain sensation and affective processing of pain in human brain. *Neuroreport* 14:791-797
- Paulson PE (1998) Gender differences in pain perception and patterns of cerebral activation during noxious heat stimulation in humans. *Pain* 76:223-229
- Smith KA (2002) Cerebellar responses during anticipation of noxious stimuli in subjects recovered from depression. *British Journal of Psychiatry* 181:411-415

Strigo IA (2003) Differentiation of visceral and cutaneous pain in the human brain. *Journal of Neurophysiology* 89:3294-3303

Svensson P (1998) Cerebral blood-flow changes evoked by two levels of painful heat stimulation: a positron emission tomography study in humans. *European Journal of Pain* 2:95-107

Xu X (1997) Functional localization of pain perception in the human brain studied by PET. *Neuroreport* 8:555-559

Becerra LR (2001) Reward circuitry activation by noxious thermal stimuli. *Neuron* 32:927-946

Bingel U (2003) Single trial fMRI reveals significant contralateral bias in responses to laser pain within thalamus and somatosensory cortices. *NeuroImage* 18:740-748

Derbyshire SWG (2002) Cerebral responses to noxious thermal stimulation in chronic low back pain patients and normal controls. *NeuroImage* 16:158-168

Derbyshire SWG (1997) Pain processing during three levels of noxious stimulation produces differential patterns of central activity. *Pain* 73:431-445

Derbyshire SWG (2002) Gender differences in patterns of cerebral activation during equal experience of painful laser stimulation. *Journal of Pain* 3:401-411

Jones AKP (1997) Reduced cortical responses to noxious heat in patients with rheumatoid arthritis. *Annals of the Rheumatic Diseases* 56:601-607

Lorenz J (2002) A unique representation of heat allodynia in the human brain. *Neuron* 35:383-393

Svensson P (1997) Cerebral processing of acute skin and muscle pain in humans. *Journal of Neurophysiology* 78:450-460

Tolle TR (1999) Region-specific encoding of sensory and affective components of pain in the human brain: A positron emission tomography correlation analysis. *Annals of Neurology* 45:40-47

Tracey I (2000) Noxious hot and cold stimulation produce common patterns of brain activation in humans: A functional magnetic resonance imaging study. *Neuroscience Letters* 288:159-162

Casey KL (2001) Temporal and spatial dynamics of human forebrain activity during heat pain: Analysis by positron emission tomography. *Journal of Neurophysiology* 85:951-959

Derbyshire SWG (1998) Cerebral responses to a continual tonic pain stimulus measured using positron emission tomography. *Pain* 76:127-135

Frankenstein UN (2001) Distraction modulates anterior cingulate gyrus activations during the cold pressor test. *NeuroImage* 14:827-836

de LR (2006) Brain activity during stimulation of the trigeminal nerve with noxious heat. *Oral Surgery, Oral Medicine, Oral Pathology, Oral Radiology, and Endodontics* 102:750-757

Mochizuki H (2007) Neural correlates of perceptual difference between itching and pain: a human fMRI study. *NeuroImage* 36:706-717

Peyron R (1999) Haemodynamic brain responses to acute pain in humans: Sensory and attentional networks. *Brain* 122:1765-1779

Rolls ET (2003) Representations of pleasant and painful touch in the human orbitofrontal and cingulate cortices. *Cerebral Cortex* 13:308-317

Petrovic P (2002) A regression analysis study of the primary somatosensory cortex during pain. *NeuroImage* 16:1142-1150

Valet M (2004) Distraction modulates connectivity of the cingulo-frontal cortex and the midbrain during pain - An fMRI analysis. *Pain* 109:399-408

Petrovic P (2002) Placebo and opioid analgesia - Imaging a shared neuronal network. *Science* 295:1737-1740

Farrell MJ (2006) Unique, common, and interacting cortical correlates of thirst and pain. *Proceedings of the National Academy of Sciences* 103:2416-2421

Singer T (2004) Empathy for pain involves the affective but not sensory aspects of pain. *Science* 303:1157-1162

Schmahl C (2006) Neural correlates of antinociception in borderline personality disorder. *Archives of General Psychiatry* 63:659-667

Geuze E W (2007) Altered pain processing in veterans with posttraumatic stress disorder. *Archives of General Psychiatry* 64:76-85

Maihofner C (2007) Brain imaging of analgesic and antihyperalgesic effects of cyclooxygenase inhibition in an experimental human pain model: A functional MRI study. *European Journal of Neuroscience* 26:1344-1356

Botvinick MM (2005) Viewing facial expressions of pain engages cortical areas involved in the direct experience of pain. *NeuroImage* 25:312-319

Iadarola MJ (1998) Neural activation during acute capsaicin-evoked pain and allodynia assessed with PET. *Brain* 121:931-947

Adcock JE (2003) Quantitative fMRI assessment of the differences in lateralization of language-related brain activation in patients with temporal lobe epilepsy. *NeuroImage* 18:423-438

Fox PT (1996) A PET study of the neural systems of stuttering. *Nature* 382:158-162

Fox PT (2001) Location-probability profiles for the mouth region of human primary motor-sensory cortex: Model and validation. *NeuroImage* 13:196-209

Lotze M (2000) The representation of articulation in the primary sensorimotor cortex. *Neuroreport* 11:2985-2989

Rosen HJ (2000) Neural correlates of recovery from aphasia after damage to left inferior frontal cortex. *Neurology* 55:1883-1894

Xiong J (2000) Intersubject variability in cortical activations during a complex language task. *NeuroImage* 12:326-339

Etard O (2000) Picture naming without Broca's and Wernicke's area. *Neuroreport* 11:617-622

Tan LH (2001) An fMRI study with written Chinese. *Neuroreport* 12:83-88

Bookheimer SY (1995) Regional cerebral blood flow during object naming and word reading. *Human Brain Mapping* 3:93-106

Braun AR (1997) Altered patterns of cerebral activity during speech and language production in developmental stuttering. *Brain* 120:761-784

Paus T (1993) Role of the human anterior cingulate cortex in the control of oculomotor, manual, and speech responses: A positron emission tomography study. *Journal of Neurophysiology* 70:453-469

- Petersen SE (1988) Positron emission tomographic studies of the cortical anatomy of single-word processing. *Nature* 331:585-589
- Fiez JA (1999) Effects of lexicality, frequency, and spelling-to-sound consistency on the functional anatomy of reading. *Neuron* 24:205-218
- Hagoort P (1999) The neural circuitry involved in the reading of German words and pseudowords: A PET study. *Journal of Cognitive Neuroscience* 11:383-398
- Jernigan TL (1998) Brain activation during word identification and word recognition. *NeuroImage* 8:93-105
- Rumsey JM (1997) Phonological and orthographic components of word recognition. *Brain* 120:739-759
- Bookheimer SY (2000) Activation of language cortex with automatic speech tasks. *Neurology* 55:1151-1157
- Ingham RJ (2000) Is overt stuttered speech a prerequisite for the neural activations associated with chronic developmental stuttering? *Brain and Language* 75:163-194
- Chee MWL (1999) Mandarin and English single word processing studied with functional magnetic resonance imaging. *Journal of Neuroscience* 19:3050-3056
- De Nil LF (2003) A positron emission tomography study of short and long term treatment effects on functional brain activation in adults who stutter. *Journal of Fluency Disorders* 28:357-380
- Tatsumi IF (1999) Verb generation in Japanese - A multicenter PET activation study. *NeuroImage* 9:154-164
- Price CJ (1996) Hearing and saying: The functional neuro-anatomy of auditory word processing. *Brain* 119:919-931
- Price CJ (1996) The effect of varying stimulus rate and duration on brain activity during reading. *NeuroImage* 3:40-52
- De Nil LF (2000) A positron emission tomography study of silent and oral single word reading in stuttering and nonstuttering adults. *Journal of Speech, Language, and Hearing Research* 43:1038-1053
- Martin A (1996) Neural correlates of category-specific knowledge. *Nature* 379:649-652



Murtha S C (1999) The neural substrate of picture naming. *Journal of Cognitive Neuroscience* 11:399-423

Nakamura K (2000) Participation of the left posterior inferior temporal cortex in writing and mental recall of kanji orthography: A functional MRI study. *Brain* 123:954-967

Petersen SE (1989) Positron emission tomographic studies of the processing of single words. *Journal of Cognitive Neuroscience* 1:153-170

Heim S O (2002) Broca's area in the human brain is involved in the selection of grammatical gender for language production: Evidence from event-related functional magnetic resonance imaging. *Neuroscience Letters* 328:101-104

Brown S M (2006) Music and language side by side in the brain: A PET study of the generation of melodies and sentences. *European Journal of Neuroscience* 23:2791-2803

Riecker A (2000) Opposite hemispheric lateralization effects during speaking and singing at motor cortex, insula and cerebellum. *Neuroreport* 11:1997-2000

Soros P (2006) Clustered functional MRI of overt speech production. *NeuroImage* 32:376-387

Mechelli A (2006) Semantic relevance explains category effects in medial fusiform gyri. *NeuroImage* 30:992-1002

Wildgruber D (1996) Functional lateralization of speech production at primary motor cortex: an fMRI study. *Neuroreport* 7:2791-2795

Riecker A (2002) Hemispheric lateralization effects of rhythm implementation during syllable repetitions: An fMRI study. *NeuroImage* 16:169-176

Riecker A (2006) The cerebral control of speech tempo: Opposite relationship between speaking rate and BOLD signal changes at striatal and cerebellar structures. *NeuroImage* 29:46-53

Riecker A (2005) fMRI reveals two distinct cerebral networks subserving speech motor control. *Neurology* 64:700-706

Wilson SM (2004) Listening to speech activates motor areas involved in speech production. *Nature Neuroscience* 7:701-702

Tremblay P (2006) Contribution of the frontal lobe to externally and internally specified verbal responses: fMRI evidence. *NeuroImage* 33:947-957

- Kemeny S Y (2005) Comparison of continuous overt speech fMRI using BOLD and arterial spin labeling. *Human Brain Mapping* 24:173-183
- Basho S P (2007) Effects of generation mode in fMRI adaptations of semantic fluency: Paced production and overt speech. *Neuropsychologia* 45:1697-1706
- Bohland JW (2006) An fMRI investigation of syllable sequence production. *NeuroImage* 32:821-841
- Riecker A (2000) Articulatory/phonetic sequencing at the level of the anterior perisylvian cortex: A functional magnetic resonance imaging (fMRI) study. *Brain and Language* 75:259-276
- Kircher TTJ (2004) Pausing for thought: Engagement of left temporal cortex during pauses in speech. *NeuroImage* 21:84-90
- Kleber B (2007) Overt and imagined singing of an Italian aria. *NeuroImage* 36:889-900
- Brown S N (2008) A larynx area in the human motor cortex. *Cerebral Cortex* 18:837-845
- Andreasen NC (1995) Remembering the past: Two facets of episodic memory explored with positron emission tomography. *American Journal of Psychiatry* 152:1576-1585
- Rektorova I (2007) Functional abnormalities in the primary orofacial sensorimotor cortex during speech in Parkinson's disease. *Movement Disorders* 22:2043-2051
- Ghosh SS (2008) A neuroimaging study of premotor lateralization and cerebellar involvement in the production of phonemes and syllables. *Journal of Speech, Language, and Hearing Research* 51:1183-1202
- Tourville JA (2008) Neural mechanisms underlying auditory feedback control of speech. *NeuroImage* 39:1429-1443
- Wilson SM (2009) The neural basis of surface dyslexia in semantic dementia. *Brain* 132:71-86
- Cabeza R (2002) Similarities and differences in the neural correlates of episodic memory retrieval and working memory. *NeuroImage* 16:317-330
- Dade LA (2001) Working memory in another dimension: functional imaging of human olfactory working memory. *NeuroImage* 14:650-660

- Garavan H (2000) Practice-related functional activation changes in a working memory task. *Microscopy Research and Technique* 51:54-63
- Kapur S T (1996) The neural correlates of intentional learning of verbal materials: A PET study in humans. *Journal of Cognitive Neuroscience* 4:243-249
- Lee TMC (2002) Lie detection by functional magnetic resonance imaging. *Human Brain Mapping* 15:157-164
- Leveroni CL (2000) Neural systems underlying the recognition of familiar and newly learned faces. *Journal of Neuroscience* 20:878-886
- Owen AM (1998) Functional organization of spatial and nonspatial working memory processing within the human lateral frontal cortex. *Proceedings of the National Academy of Sciences* 95:7721-7726
- Sperling RA (2001) Encoding novel face-name associations: A functional MRI study. *Human Brain Mapping* 14:129-139
- Stern CE (2000) Activity in ventrolateral and mid-dorsolateral prefrontal cortex during nonspatial visual working memory processing: Evidence from functional magnetic resonance imaging. *NeuroImage* 11:392-399
- Pessoa L (2002) Neural correlates of visual working memory: fMRI amplitude predicts task performance. *Neuron* 35:975-987
- Petit L (1998) Sustained activity in the medial wall during working memory delays. *Journal of Neuroscience* 18:9429-9437
- Pochon JB (2001) The role of dorsolateral prefrontal cortex in the preparation of forthcoming actions: An fMRI study. *Cerebral Cortex* 11:260-266
- Bunge SA (2001) Prefrontal regions involved in keeping information in and out of mind. *Brain* 124:2074-2086
- Hasson U (2002) Eccentricity bias as an organizing principle for human high-order object areas. *Neuron* 34:479-490
- Kelley WM (1998) Hemispheric specialization in human dorsal frontal cortex and medial temporal lobe for verbal and nonverbal memory encoding. *Neuron* 20:927-936
- Mellet E B (2000) Neural correlates of topographic mental exploration: the impact of route versus survey perspective learning. *NeuroImage* 12:588-600

Rypma B (1999) Load-dependent roles of frontal brain regions in the maintenance of working memory. *NeuroImage* 9:216-226

Mazard A (2002) Impact of fMRI acoustic noise on the functional anatomy of visual mental imagery. *Journal of Cognitive Neuroscience* 14:172-186

Zago L (2002) Distinguishing visuospatial working memory and complex mental calculation areas within the parietal lobes. *Neuroscience Letters* 331:45-49

Rowe JB (2000) The prefrontal cortex: Response selection or maintenance within working memory? *Science* 288:1656-1660

Clark CR (2000) Updating working memory for words: A PET activation study. *Human Brain Mapping* 9:42-54

Crespo-Facorro B (2001) Neural basis of novel and well-learned recognition memory in schizophrenia: A positron emission tomography study. *Human Brain Mapping* 12:219-231

Thierry G (2003) Demand on verbal working memory delays haemodynamic response in the inferior prefrontal cortex. *Human Brain Mapping* 19:37-46

Braver TS (2001) Direct comparison of prefrontal cortex regions engaged by working and long-term memory tasks. *NeuroImage* 14:48-59

Braver TS (1997) A parametric study of prefrontal cortex involvement in human working memory. *NeuroImage* 5:49-62

Callicott JH (1999) Physiological characteristics of capacity constraints in working memory as revealed by functional MRI. *Cerebral Cortex* 9:20-26

Carlson S M (1998) Distribution of cortical activation during visuospatial n-back tasks as revealed by functional magnetic resonance imaging. *Cerebral Cortex* 8:743-752

Druzgal TJ (2001) Activity in fusiform face area modulated as a function of working memory load. *Cognitive Brain Research* 10:355-364

Gruber O (2003) The functional neuroanatomy of human working memory revisited: Evidence from 3-T fMRI studies using classical domain-specific interference tasks. *NeuroImage* 19:797-809

Phillips ML (1998) Investigation of facial recognition memory and happy and sad facial expression perception: An fMRI study. *Psychiatry Research* 83:127-138

Veltman DJ (2003) Maintenance versus manipulation in verbal working memory revisited: An fMRI study. *NeuroImage* 18:247-256

Casey BJ (1998) Reproducibility of fMRI results across four institutions using a spatial working memory task. *NeuroImage* 8:249-261

Cohen JD (1994) Activation of the prefrontal cortex in a nonspatial working memory task with functional MRI. *Human Brain Mapping* 1:293-304

Cohen JD (1997) Temporal dynamics of brain activation during a working memory task. *Nature* 386:604-608

Desmond JE (2003) Increased frontocerebellar activation in alcoholics during verbal working memory: an fMRI study. *NeuroImage* 19:1510-1520

Hautzel H (2002) Topographic segregation and convergence of verbal, object, shape and spatial working memory in humans. *Neuroscience Letters* 26:156-160

Honey GD (2000) Prolonged reaction time to a verbal working memory task predicts increased power of posterior parietal cortical activation. *NeuroImage* 12:495-503

Jonides J (1997) Verbal working memory load affects regional brain activation as measured by PET. *Journal of Cognitive Neuroscience* 9:462-475

Kim JJ (2002) Dissociation of working memory processing associated with native and second languages: PET investigation. *NeuroImage* 15:879-891

Martinkauppi S R (2000) Working memory of auditory localization. *Cerebral Cortex* 10:889-898

Owen AM (1999) Redefining the functional organization of working memory processes within human lateral prefrontal cortex. *European Journal of Neuroscience* 11:567-574

Smith EE (1996) Dissociating verbal and spatial working memory using PET. *Cerebral Cortex* 6:11-20

Awh E J (1996) Dissociation of storage and rehearsal in verbal working memory: evidence from positron emission tomography. *Psychological Science* 7:25-31

Becker JT (1994) Functional neuroanatomy of verbal free recall: A replication study. *Human Brain Mapping* 1:284-292

Fiez JA (1996) A positron emission tomography study of the short-term maintenance of verbal information. *Journal of Neuroscience* 16:808-822

Grasby PM (1994) A graded task approach to the functional mapping of brain areas implicated in auditory-verbal memory. *Brain* 117:1271-1282

Kim JJ (2003) Functional disconnection between the prefrontal and parietal cortices during working memory processing in schizophrenia: a [<sup>15</sup>O]H<sub>2</sub>O PET study. *American Journal of Psychiatry* 160:919-923

Ragland JD (2002) Working memory for complex figures: An fMRI comparison of letter and fractal n-back tasks. *Neuropsychology* 16:370-379

Schumacher EH (1996) PET evidence for an amodal verbal working memory system. *NeuroImage* 3:79-88

Honey GD (1999) Differences in frontal cortical activation by a working memory task after substitution of risperidone for typical antipsychotic drugs in patients with schizophrenia. *Proceedings of the National Academy of Sciences* 96:13432-13437

Honey GD (2002) De-coupling of cognitive performance and cerebral functional response during working memory in schizophrenia. *Schizophrenia Research* 53:45-56

Wykes T (2002) Effects on the brain of a psychological treatment: Cognitive remediation therapy: Functional magnetic resonance imaging in schizophrenia. *British Journal of Psychiatry* 181:144-152

Chen JK (2004) Functional abnormalities in symptomatic concussed athletes: An fMRI study. *NeuroImage* 22:68-82

Landau SM (2004) A functional MRI study of the influence of practice on component processes of working memory. *NeuroImage* 22:211-221

Honey GD (2003) The functional neuroanatomy of schizophrenic subsyndromes. *Psychological Medicine* 33:1007-1018

LaBar KS (1999) Neuroanatomic overlap of working memory and spatial attention networks: A functional MRI comparison within subjects. *NeuroImage* 10:695-704

van TM (2000) Long-lasting cortical plasticity in the object naming system. *Nature Neuroscience* 3:1329-1334

Kawashima R (1998) Oculomotor sequence learning: A positron emission tomography study. *Experimental Brain Research* 122:1-8

Breitenstein C (2005) Hippocampus activity differentiates good from poor learners of a novel lexicon. *NeuroImage* 25:958-968

Drobyshevsky A (2006) A rapid fMRI task battery for mapping of visual, motor, cognitive, and emotional function. *NeuroImage* 31:732-744

Cairo TA (2004) The influence of working memory load on phase specific patterns of cortical activity. *Cognitive Brain Research* 21:377-387

Caldwell JA (2005) Are individual differences in fatigue vulnerability related to baseline differences in cortical activation? *Behavioral Neuroscience* 119:694-707

Leung HC (2002) Sustained mnemonic response in the human middle frontal gyrus during on-line storage of spatial memoranda. *Journal of Cognitive Neuroscience* 14:659-671

Mendrek A (2004) Changes in distributed neural circuitry function in patients with first-episode schizophrenia. *British Journal of Psychiatry* 185:205-214

Menon V (2001) Functional neuroanatomy of auditory working memory in schizophrenia: Relation to positive and negative symptoms. *NeuroImage* 13:433-446

Perlstein WM (2003) Prefrontal cortex dysfunction mediates deficits in working memory and prepotent responding in schizophrenia. *Biological Psychiatry* 53:25-38

Yoo SS (2005) Working memory processing of facial images in schizophrenia: fMRI investigation. *International Journal of Neuroscience* 115:351-366

Johnson MR (2006) A functional magnetic resonance imaging study of working memory abnormalities in schizophrenia. *Biological Psychiatry* 60:11-21

Linden DEJ (2003) Cortical capacity constraints for visual working memory: Dissociation of fMRI load effects in a fronto-parietal network. *NeuroImage* 20:1518-1530

Monks PJ (2004) A functional MRI study of working memory task in euthymic bipolar disorder: Evidence for task-specific dysfunction. *Bipolar Disorders* 6:550-564

Mu Q (2005) Decreased cortical response to verbal working memory following sleep deprivation. *Sleep* 28:55-67

Rypma B (2001) Age differences in prefrontal cortical activity in working memory. *Psychology and Aging* 16:371-384

Volle E P (2005) Specific cerebral networks for maintenance and response organization within working memory as evidenced by the 'double delay/double response' paradigm. *Cerebral Cortex* 15:1064-1074

Harvey PO (2005) Cognitive control and brain resources in major depression: An fMRI study using the n-back task. *NeuroImage* 26:860-869

Manoach DS (2000) Schizophrenic subjects show aberrant fMRI activation of dorsolateral prefrontal cortex and basal ganglia during working memory performance. *Biological Psychiatry* 48:99-109

Mendrek A (2005) Dysfunction of a distributed neural circuitry in schizophrenia patients during a working-memory performance. *Psychological Medicine* 35:187-196

Quintana J (2003) Prefrontal-posterior parietal networks in schizophrenia: Primary dysfunctions and secondary compensations. *Biological Psychiatry* 53:12-24

Bedwell JS (2005) Functional neuroanatomy of subcomponent cognitive processes involved in verbal working memory. *International Journal of Neuroscience* 115:1017-1032

Druzgal TJ (2001) A neural network reflecting decisions about human faces. *Neuron* 32:947-955

Meisenzahl EM (2006) Effects of treatment with the atypical neuroleptic quetiapine on working memory function: A functional MRI follow-up investigation. *European Archives of Psychiatry and Clinical Neuroscience* 256:522-531

Lagopoulos J (2007) An event-related functional MRI study of working memory in euthymic bipolar disorder. *Journal of Psychiatry and Neuroscience* 32:174-184

Koshino H (2008) fMRI investigation of working memory for faces in autism: Visual coding and underconnectivity with frontal areas. *Cerebral Cortex* 18:289-300

Pfefferbaum A (2001) Reorganization of frontal systems used by alcoholics for spatial working memory: An fMRI study. *NeuroImage* 14:7-20

van der Wee NJA (2003) Spatial working memory deficits in obsessive compulsive disorder are associated with excessive engagement of the medial frontal cortex. *NeuroImage* 20:2271-2280



- Savage CR (2001) Prefrontal regions supporting spontaneous and directed application of verbal learning strategies: Evidence from PET. *Brain* 124:219-231
- Matsuo K (2007) Prefrontal hyperactivation during working memory task in untreated individuals with major depressive disorder. *Molecular Psychiatry* 12:158-166
- Walter H (2007) Increased left prefrontal activation in patients with unipolar depression: An event-related, parametric, performance-controlled fMRI study. *Journal of Affective Disorders* 101:175-185
- Sheridan MA (2007) Efficiency of the prefrontal cortex during working memory in attention-deficit/hyperactivity disorder. *Journal of the American Academy of Child and Adolescent Psychiatry* 46:1357-1366
- Mayer JS (2007) Common neural substrates for visual working memory and attention. *NeuroImage* 36:441-453
- Kumari V (2006) Neural dysfunction and violence in schizophrenia: An fMRI investigation. *Schizophrenia Research* 84:144-164
- Postle BR (2007) Nonvisual codes and nonvisual brain areas support visual working memory. *Cerebral Cortex* 17:2151-2162
- Neuner I (2007) Wechsler Memory Scale Revised Edition: Neural correlates of the visual paired associates subtest adapted for fMRI. *Brain Research* 1177:66-78
- Koppelstaetter F (2008) Does caffeine modulate verbal working memory processes? An fMRI study. *NeuroImage* 39:492-499
- Sanchez-Carrion R (2008) Frontal hypoactivation on functional magnetic resonance imaging in working memory after severe diffuse traumatic brain injury. *Journal of Neurotrauma* 25:479-494
- Ricciardi E B (2006) Neural correlates of spatial working memory in humans: A functional magnetic resonance imaging study comparing visual and tactile processes. *Neuroscience* 139:339-349
- Naito E K (2000) Fast reaction to different sensory modalities activates common fields in the motor areas, but the anterior cingulate cortex is involved in the speed of reaction. *Journal of Neurophysiology* 83:1701-1709
- Naito E E (1999) Illusory arm movements activate cortical motor areas: a positron emission tomography study. *Journal of Neuroscience* 19:6134-6144

- Gelnar PA (1999) A comparative fMRI study of cortical representations for thermal painful, vibrotactile, and motor performance tasks. *NeuroImage* 10:460-482
- Coghill RC (1994) Distributed processing of pain and vibration by the human brain. *Journal of Neuroscience* 14:4095-4108
- Deuchert M (2002) Event-related fMRI of the somatosensory system using electrical finger stimulation. *Neuroreport* 13:365-369
- Johansen-Berg H (2000) Attention to touch modulates activity in both primary and secondary somatosensory areas. *Neuroreport* 11:1237-1241
- Lepage M (2001) Transperceptual encoding and retrieval processes in memory: a PET study of visual and haptic objects. *NeuroImage* 14:572-584
- Ploner M (2000) Differential organization of touch and pain in human primary somatosensory cortex. *Journal of Neurophysiology* 83:1770-1776
- Seitz RJ (1992) Vibratory stimulation increases and decreases the regional cerebral blood flow and oxidative metabolism: a positron emission tomography (PET) study. *Acta Neurologica Scandinavica* 86:60-67
- Seitz RJ (1991) Somatosensory discrimination of shape: tactile exploration and cerebral activation. *European Journal of Neuroscience* 3:481-492
- Kitada R (2003) Moving tactile stimuli of fingers are integrated in the intraparietal and inferior parietal cortices. *Neuroreport* 14:719-724
- Yoo SS (2003) Neural substrates of tactile imagery: A functional MRI study. *Neuroreport* 14:581-585
- Bodegard A (2000) Somatosensory areas in man activated by moving stimuli: cytoarchitectonic mapping and PET. *Neuroreport* 11:187-191
- Burton H (1997) Multiple foci in parietal and frontal cortex activated by rubbing embossed grating patterns across fingerpads: a positron emission tomography study in humans. *Cerebral Cortex* 7:3-17
- Burton H (1999) Tactile attention tasks enhance activation in somatosensory regions of parietal cortex: a positron emission tomography study. *Cerebral Cortex* 9:662-674
- Francis ST (2000) fMRI of the responses to vibratory stimulation of digit tips. *NeuroImage* 11:188-202

Hagen MC (2002) Somatosensory processing in the human inferior prefrontal cortex. *Journal of Neurophysiology* 88:1400-1406

Blakemore SJ (1999) The cerebellum contributes to somatosensory cortical activity during self-produced tactile stimulation. *NeuroImage* 10:448-459

Numminen J (2004) Cortical activation during a spatiotemporal tactile comparison task. *NeuroImage* 22:815-821

Yoo SS (2004) Modulation of cerebellar activities by acupuncture stimulation: evidence from fMRI study. *NeuroImage* 22:932-940

Lorenz J (2002) A unique representation of heat allodynia in the human brain. *Neuron* 35:383-393

Hlushchuk Y (2006) Transient suppression of ipsilateral primary somatosensory cortex during tactile finger stimulation. *Journal of Neuroscience* 26:5819-5824

Hagen MC (2002) Tactile motion activates the human middle temporal/V5 (MT/V5) complex. *European Journal of Neuroscience* 16:957-964

Kitada R (2005) Tactile estimation of the roughness of gratings yields a graded response in the human brain: An fMRI study. *NeuroImage* 25:90-100

Zhang M (2005) Tactile discrimination of grating orientation: fMRI activation patterns. *Human Brain Mapping* 25:370-377

Rolls ET (2003) Representations of pleasant and painful touch in the human orbitofrontal and cingulate cortices. *Cerebral Cortex* 13:308-317

Eickhoff SB (2006) Segregation of visceral and somatosensory afferents: An fMRI and cytoarchitectonic mapping study. *NeuroImage* 31:1004-1014

Carlsson K (2000) Tickling expectations: Neural processing in anticipation of a sensory stimulus. *Journal of Cognitive Neuroscience* 12:691-703

Francis ST (1999) The representation of pleasant touch in the brain and its relationship with taste and olfactory areas. *Neuroreport* 10:453-459

Hobday D, I (2001) A study of the cortical processing of ano-rectal sensation using functional MRI. *Brain* 124:361-368

Iadarola MJ (1998) Neural activation during acute capsaicin-evoked pain and allodynia assessed with PET. *Brain* 121:931-947

Lowell SY (2008) Sensory stimulation activates both motor and sensory components of the swallowing system. *NeuroImage* 42:285-295

Hui KKS (2005) The integrated response of the human cerebro-cerebellar and limbic systems to acupuncture stimulation at ST 36 as evidenced by fMRI. *NeuroImage* 27:479-496

Lotze M (2001) Cerebral activation during anal and rectal stimulation. *NeuroImage* 14:1027-1034
